# Supplementary material for: Tonotopic and non-auditory organization of the mouse dorsal inferior colliculus revealed by two-photon imaging
Source: eLife journal article supplement (doi:10.7554/elife.49091), 2019-10-15
Supplement: figures [file elife-49091-figures-v2.pdf]

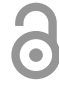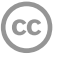

---

## Figures and figure supplements

Tonotopic and non-auditory organization of the mouse dorsal inferior colliculus revealed by two-photon imaging

**Aaron Benson Wong and J Gerard G Borst**

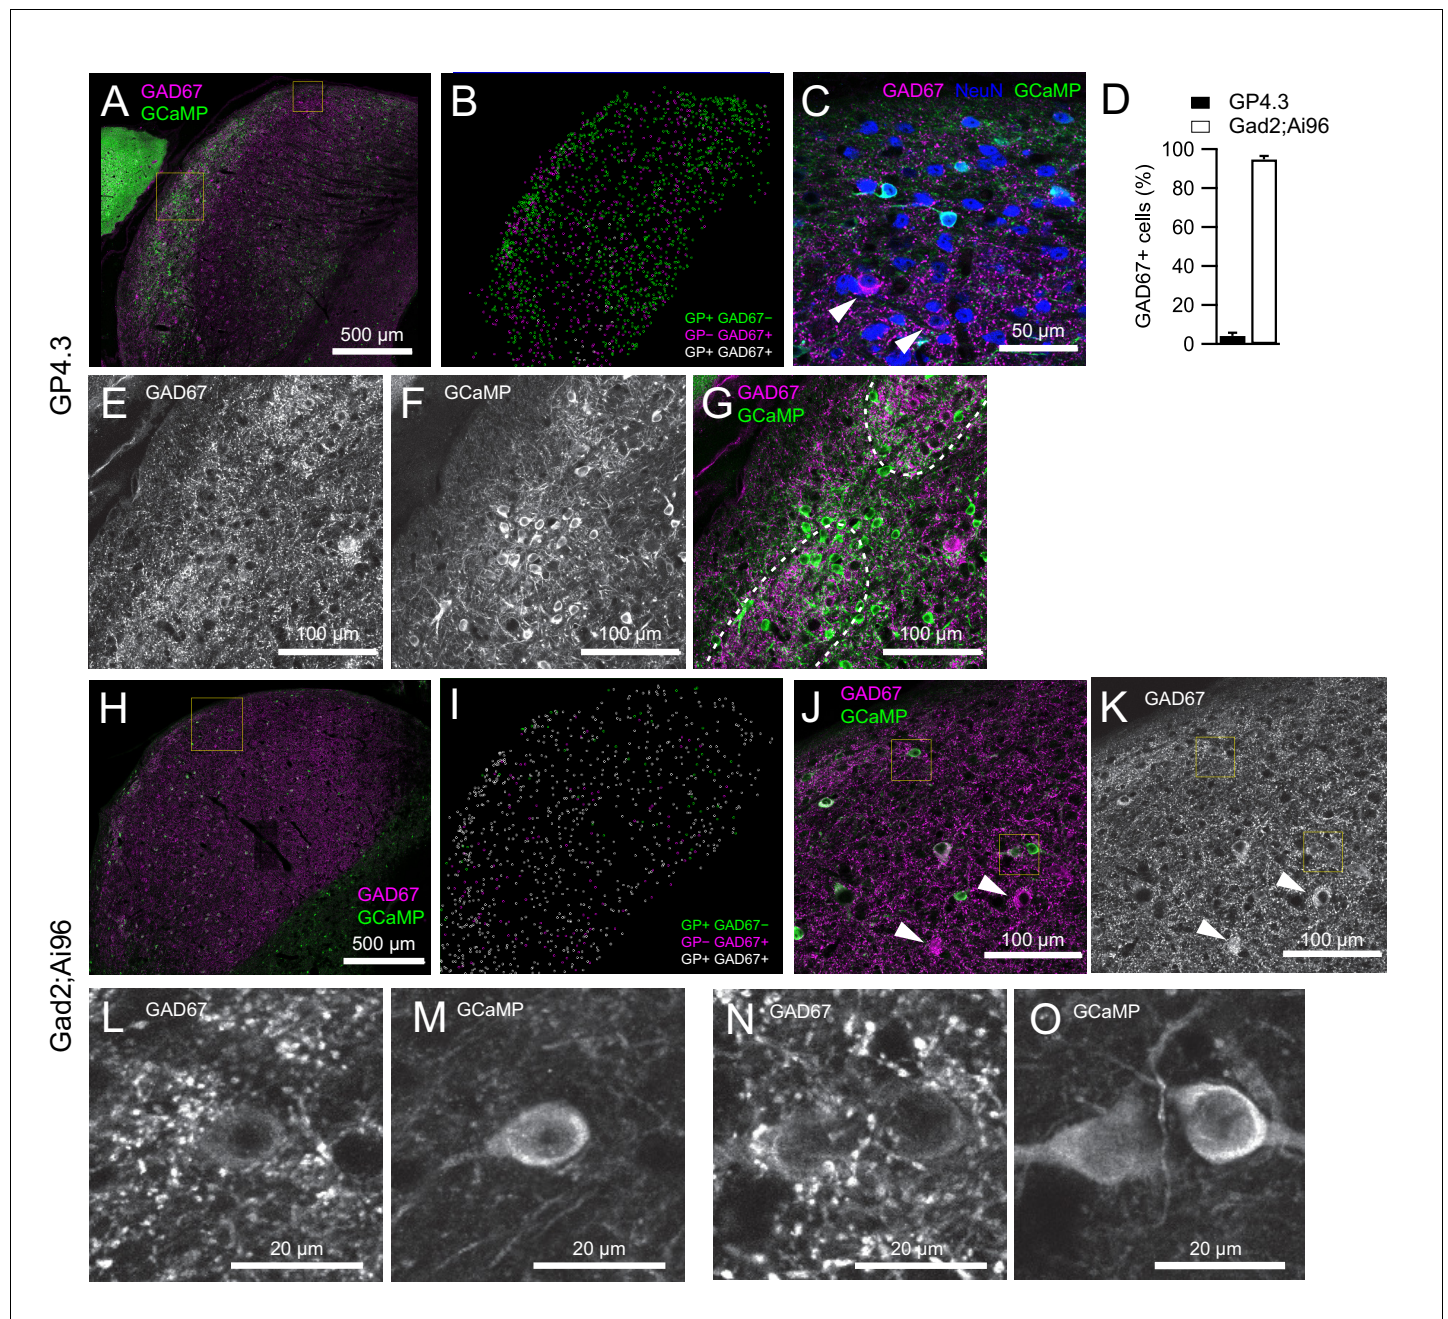

**Figure 1.** Co-expression between GCaMP6s and GAD67 in the two transgenic mouse lines. (A) Single optical section of an IC brain slice from a GP4.3 mouse immunolabeled for GAD67 (magenta) and GCaMP6s (green). (B) Distribution of GCaMP+ and GAD67+ cells within the 40  $\mu$ m brain slice in A, color-coded by their immunoreactivity to GFP and GAD67 antibodies. GP+/-: GCaMP-positive/negative. (C) Enlarged image from A (small square), showing different combinations of immunoreactivity: GCaMP (green), GAD67 (magenta) and NeuN (blue). Arrowheads point at two GP-GAD67+ cells. Due to optical sectioning only a subset of cells marked in B are visible. (D) Percentage of GCaMP+ cells showing immunoreactivity for GAD67 antibodies (error bars: s.e.m.; GP4.3: n = 3 slices from three animals; Gad2;Ai96: n = 4 slices from three animals) (E-G) Enlarged image from large square in A showing two GAD67-dense modules marked by dashed lines. GP+ cells in GP4.3 were concentrated at the border of these modules. (H-I) Same as A and B, but from a Gad2;Ai96 mouse. (J-K) Enlarged region from H (square). Arrowheads point at two GP-GAD67+ cells. (L-O) Examples of GP+GAD67+ cells from G showing images from GAD67 and GCaMP channels separately.

DOI: <https://doi.org/10.7554/eLife.49091.002>

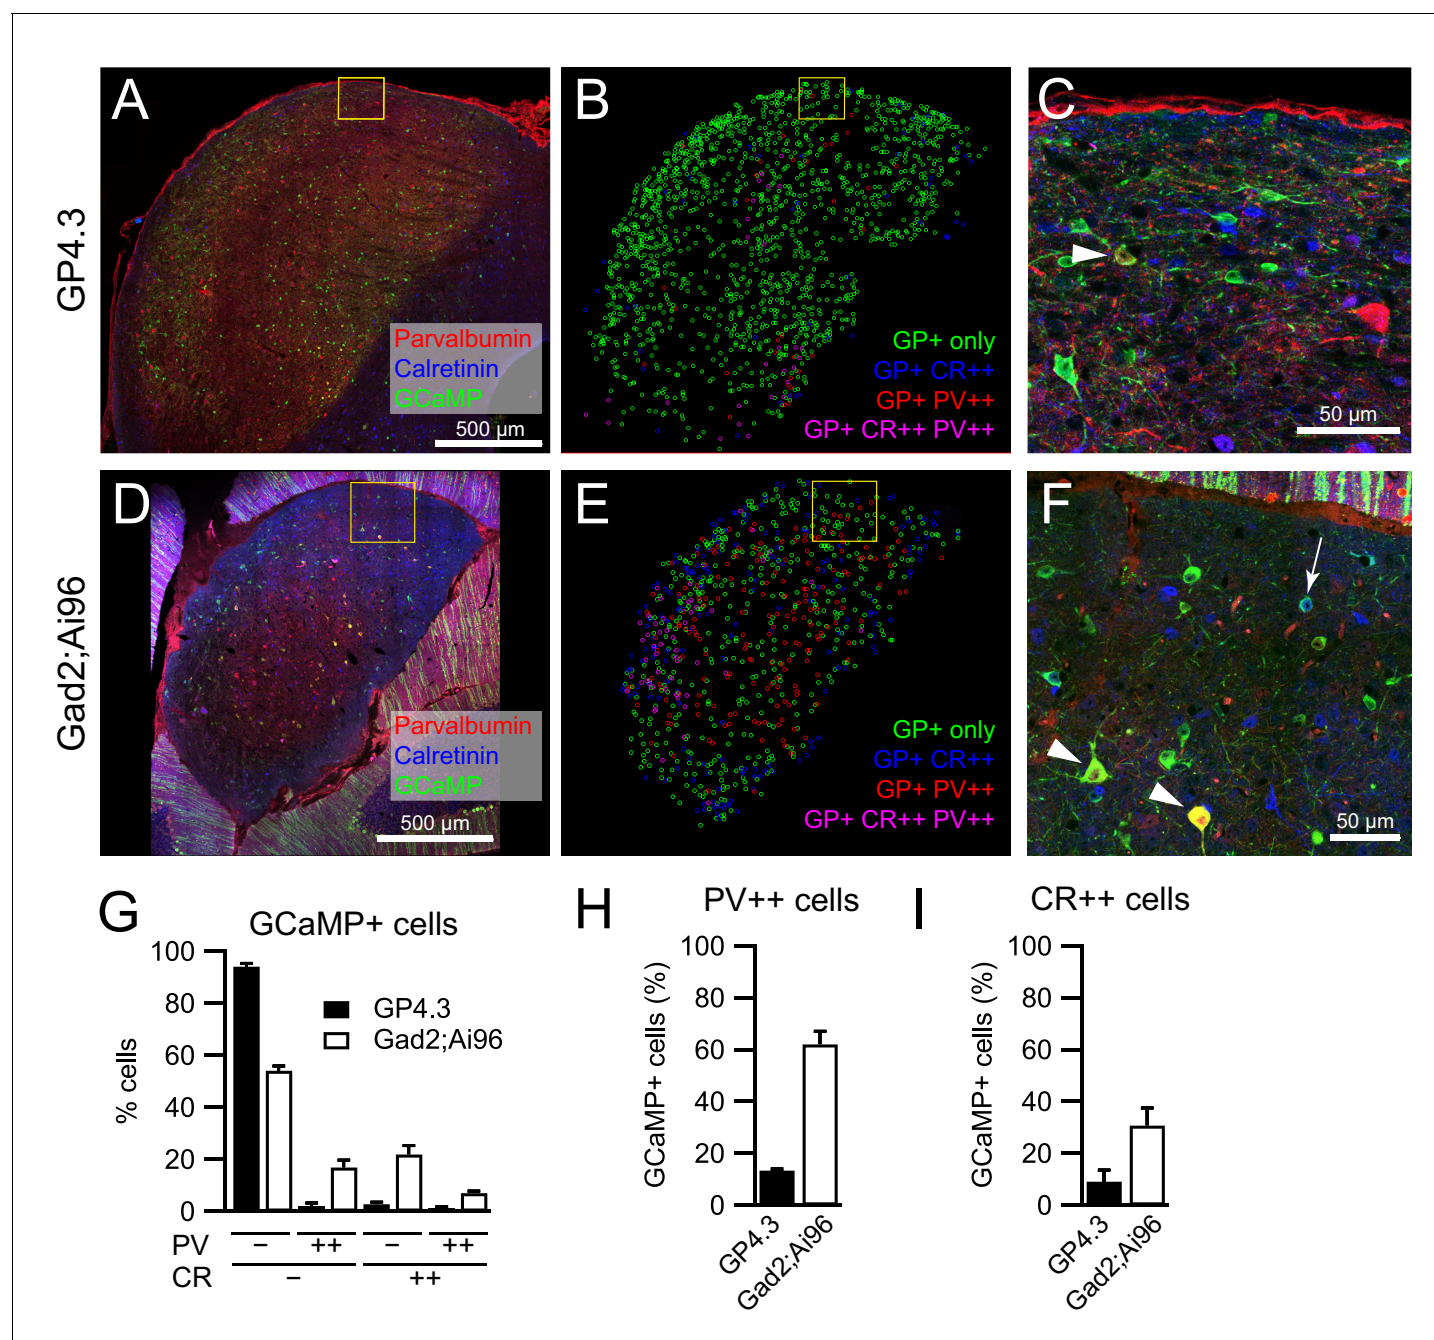

**Figure 1—figure supplement 1.** Expression of parvalbumin and calretinin in GCaMP+ neurons in the two transgenic mouse lines. (A) Single optical section of an IC brain slice from a GP4.3 mouse immunolabeled for GCaMP6s (green), parvalbumin (PV; red) and calretinin (CR; blue). (B) Distribution of GCaMP+ cells within the 40  $\mu$ m brain slice in A, color-coded by their immunoreactivity to PV and CR antibodies. (C) Enlarged image from A (square), showing different combinations of immunoreactivity. Arrowhead: GCaMP+CR-PV++ cell. Due to optical sectioning not all cells marked in B are visible. (D,E) As A and B, but from a Gad2;Ai96 mouse. (F) Enlarged region from D (square). Arrowheads: GCaMP+CR-PV++ cells; Arrow: GCaMP+CR++PV- cell. (G) Percentage of GCaMP+ cells showing immunoreactivity for PV and/or CR antibodies. (H) Percentage of PV++ cells that are GCaMP-positive. (I) Percentage of CR++ cells that are GCaMP-positive. Error bars: s.e.m.; GP4.3: n = 2 slices from two animals; Gad2;Ai96: n = 3 slices from two animals.

DOI: <https://doi.org/10.7554/eLife.49091.003>



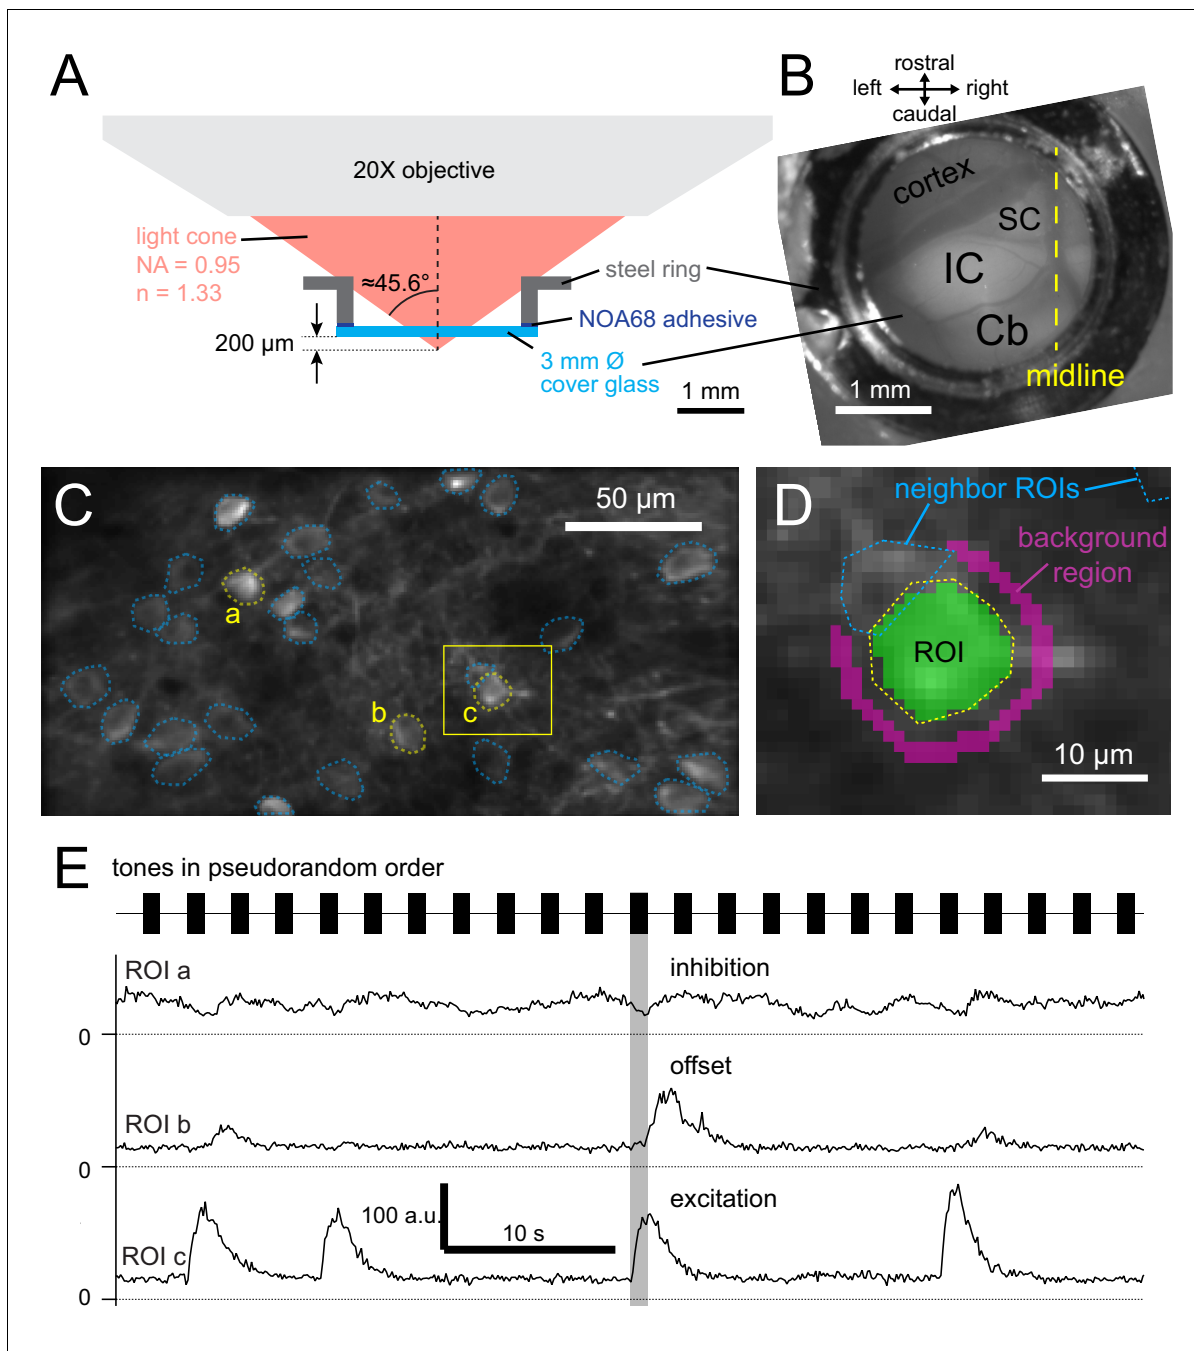

**Figure 2.** Calcium imaging of dorsal inferior colliculus in awake mice. (A) Illustration of the cranial window construct imaged with a numerical aperture (NA) 0.95 water-immersion objective. (B) Top-down view of cranial window, showing optically exposed inferior colliculus (IC), superior colliculus (SC), cerebral cortex (cortex) and cerebellum (Cb). (C) Averaged GCaMP6s fluorescence in a  $256 \times 128 \mu\text{m}$  area, showing regions-of-interest (ROIs; dotted lines) defined around neuronal somata. (D) Enlarged view from C, showing pixels included in an ROI (green overlay) and a surrounding 2  $\mu\text{m}$  wide background region (magenta overlay). Pixels belonging to other ROIs were excluded from the background region. (E) Background-subtracted fluorescence over time of the ROIs labeled a,b,c in C. Tones of 1 s duration with different frequencies and intensities were played, evoking different responses in IC neurons. The same sound (shaded area) evoked an inhibitory response in ROI a, an offset response in ROI b and a sustained excitatory response in ROI c.

DOI: <https://doi.org/10.7554/eLife.49091.005>



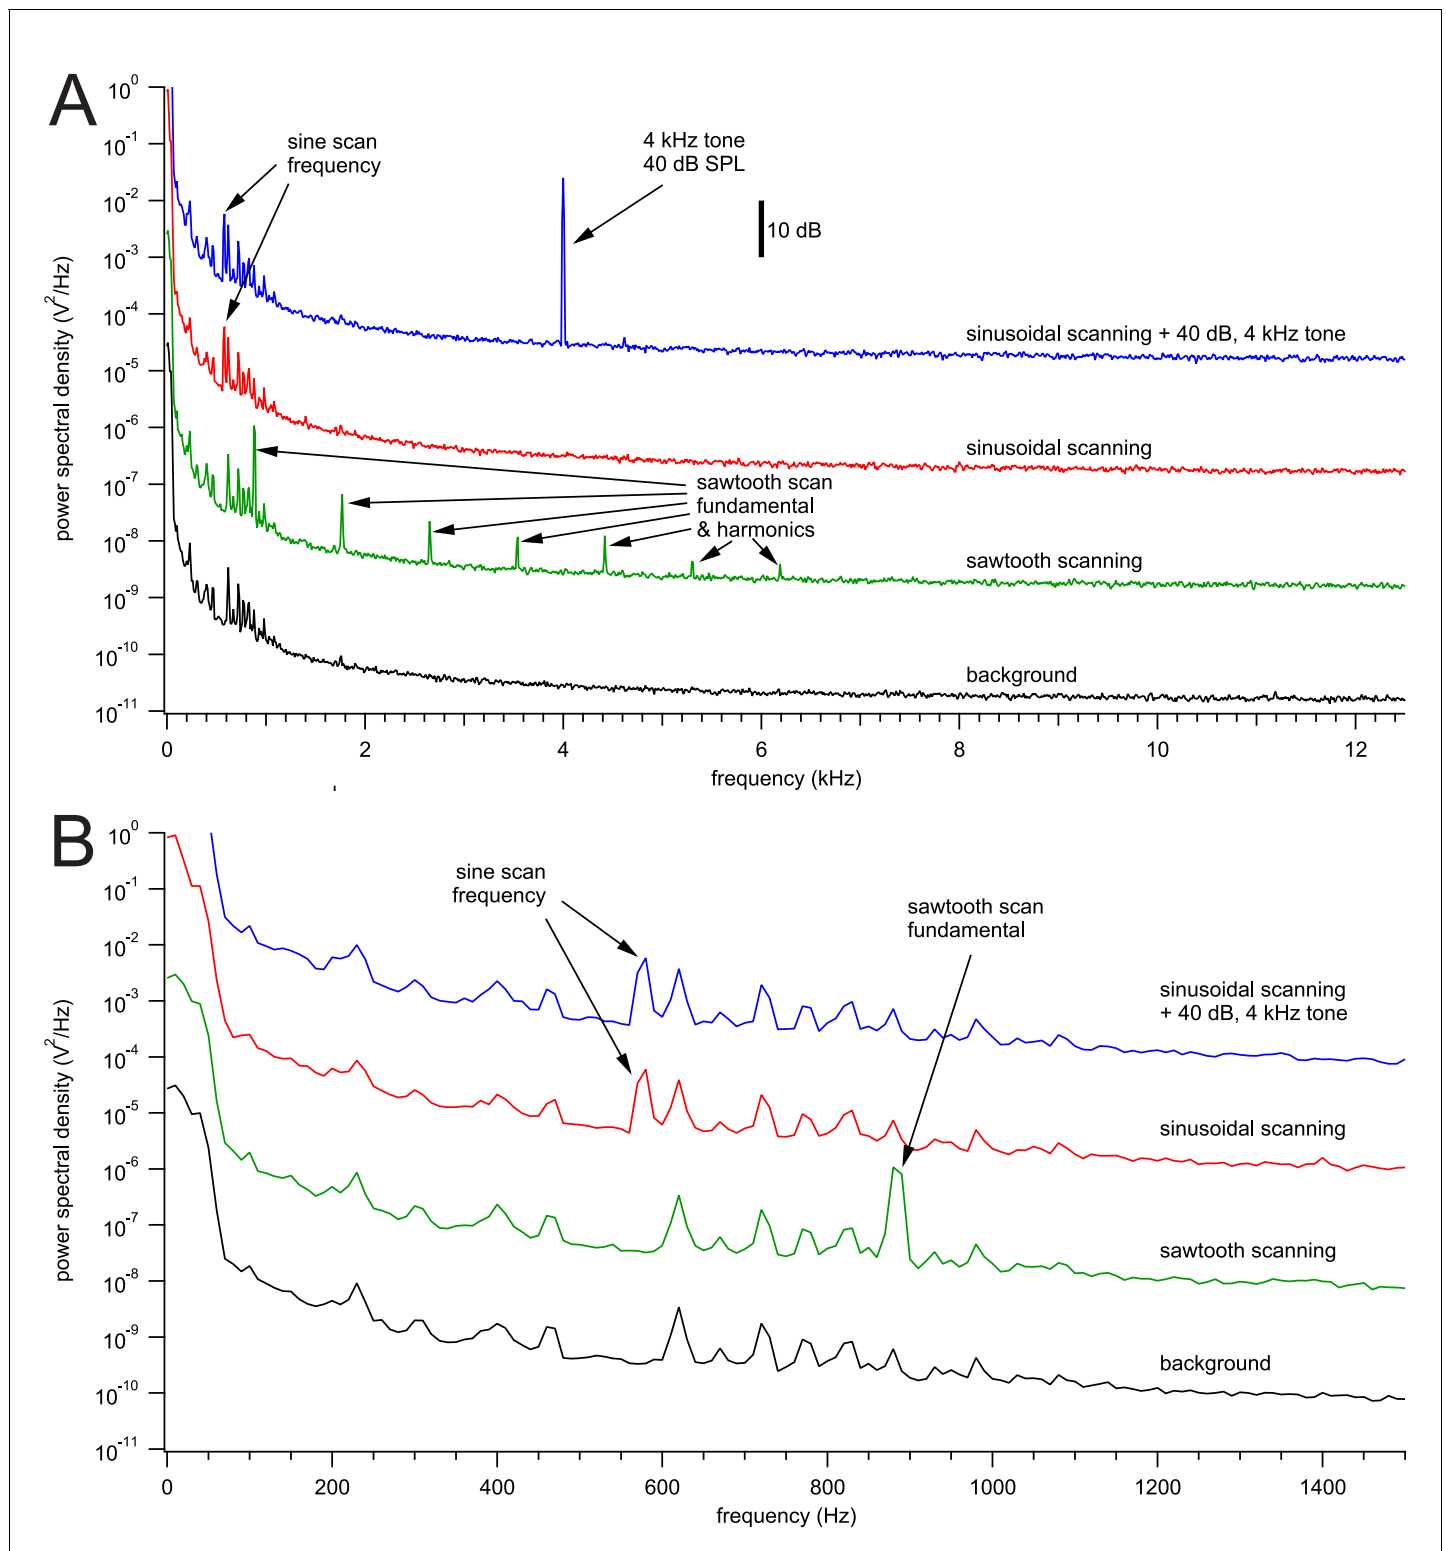

**Figure 2—figure supplement 1.** Reduction of scanner noise by sinusoidal galvo scanning. (A) Sound spectra measured with a calibration microphone (Model 7016, ACO Pacific) with a sensitivity of  $-49.1$  dBV @  $1$  Pa and  $40$  dB signal amplification, positioned where the right pinna of a mouse would be located in an experiment. Each spectrum is an average of 16 spectra calculated with the pwelch function in Matlab from one-second audio recording segments with a frequency resolution of  $10$  Hz. The spectra represent, from bottom to top, background noise (black), sawtooth scanning (green), sinusoidal scanning (red) and sinusoidal scanning with an additional  $4$  kHz,  $40$  dB SPL tone played through the speakers (blue). The spectra are offset by

Figure 2—figure supplement 1 continued on next page

Figure 2—figure supplement 1 continued

20 dB (=2 decade in power) for display, and the Y-axis corresponds to values of the background noise spectrum (bottom, black). (B) The power spectra shown near the frequencies produced during sinusoidal scanning at ~580 Hz.

DOI: <https://doi.org/10.7554/eLife.49091.006>

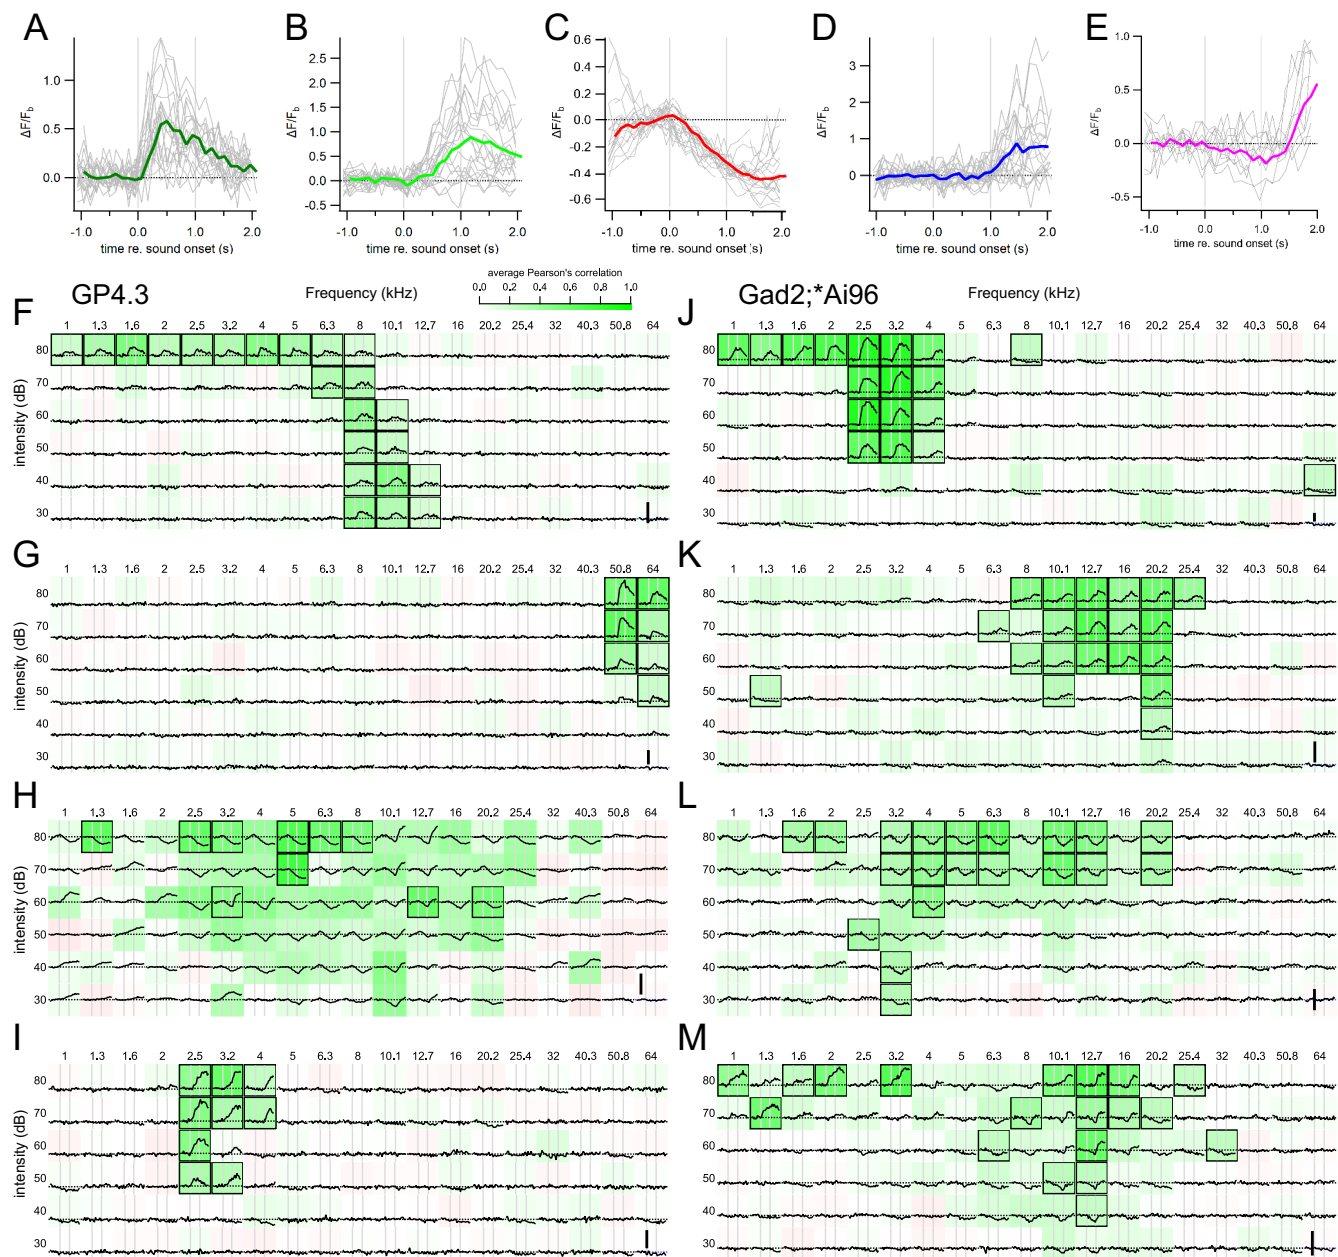

**Figure 3.** Different sound evoked responses and frequency response areas of representative example cells. (A) An onset fluorescence response to a 1 s pure tone. Gray vertical lines indicate onset and offset of sound stimulus. Colored and gray traces are average and individual trial fluorescence changes, respectively, normalized to a one-second baseline immediately before the stimulus onset ( $\Delta F/F_0$ ). (B) A sustained fluorescence response. (C) An inhibitory response. (D) An offset response. (E) A mixed inhibitory and offset response. Example FRAs from GP4.3 (F–I) and Gad2;Ai96 (J–M) mice. Each subplot shows the average  $\Delta F/F_0$  to a stimulus of the specified frequency and intensity. Background color shows average Pearson's correlation among repetitions, indicating consistency of response (Geis et al., 2011). Black squares mark significant correlation from bootstrap analysis. Cells in (G) and (J) are examples of cells with an onset FRA; cells in (F) and (K) showed a sustained FRA; cells in (H) and (L) were inhibited by sound; cells in (I) and (M) showed a mixture of different response classes. (I) A typical onset–offset cell with frequency-dependent responses: onset fluorescence responses to 2.5 kHz tones and offset fluorescent responses to 3.2 and 4 kHz tones. (M) A cell showing intensity-dependent responses: at 12.7 kHz, low intensity tones evoked a decrease in fluorescence (inhibited) while tones at 80 dB elicited an offset response. Tones at 60–70 dB elicited a mixture of inhibition and offset responses. Vertical scale bars in (F–I) indicates 1  $F_0$ .

DOI: <https://doi.org/10.7554/eLife.49091.007>



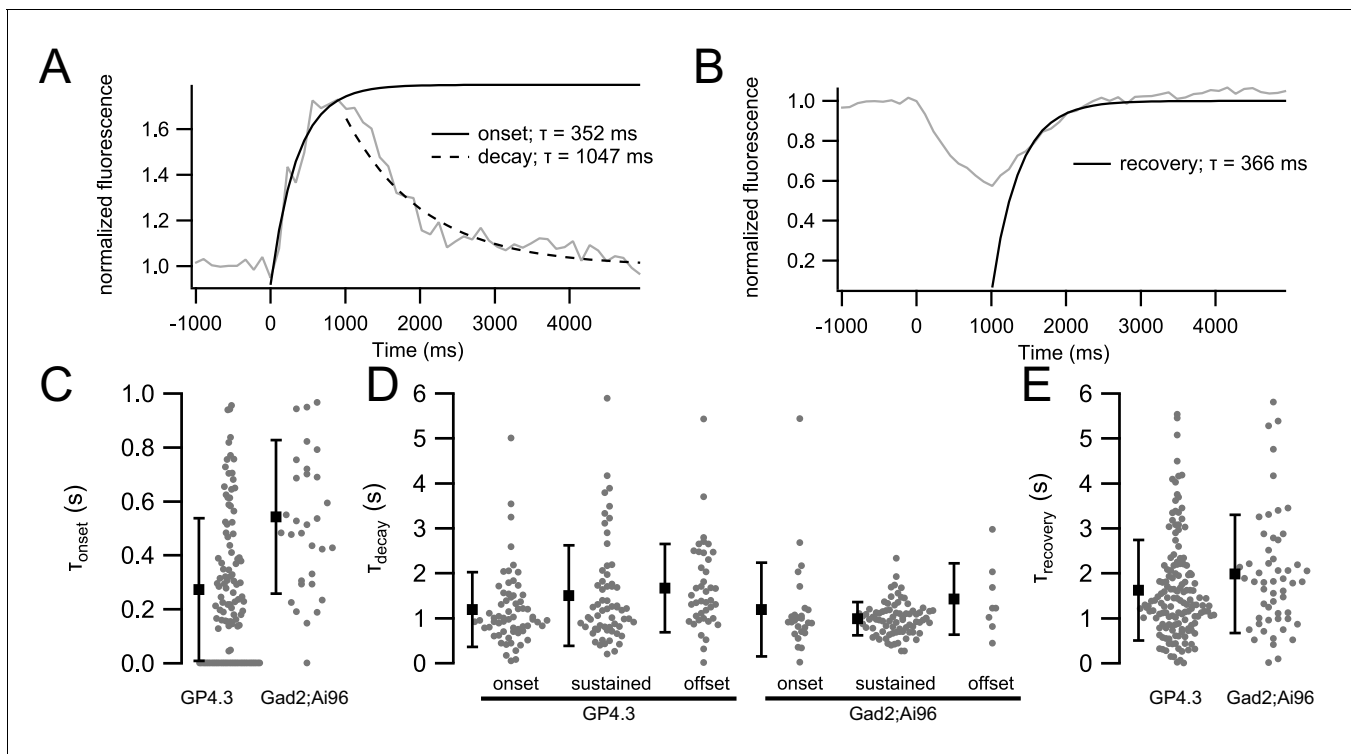

**Figure 3—figure supplement 1.** Kinetics of fluorescence responses. (A) Example of the average fluorescence response of a cell with an onset-type response to sound (gray trace). Single exponential fits were performed on the onset (0–1000 ms; solid black curve) and decay (1.5–5 s; dashed black curve) periods. Due to the short inter-stimulus interval (1.5 s), responses where another effective stimulus followed immediately were excluded for averaging. (B) For inhibitory responses, the recovery from inhibition was used for the fitting (1.5–5 s; solid black curve). (C) Onset time constant for cells showing onset response ( $\tau_{\text{onset}}$ ) (GP4.3 mean  $\tau_{\text{onset}} = 304 \pm 240$  ms,  $n = 111$  cells; Gad2;Ai96 mean  $\tau_{\text{onset}} = 514 \pm 280$  ms,  $n = 10$  cells) (D) Decay time constant ( $\tau_{\text{decay}}$ ) for cells showing onset, sustained or offset responses. Mean  $\tau_{\text{decay}}$  for onset cells (GP4.3:  $1190 \pm 828$  ms,  $n = 63$  cells; Gad2;Ai96:  $1200 \pm 1040$  ms,  $n = 26$  cells), sustained cells (GP4.3:  $1500 \pm 1120$  ms,  $n = 61$  cells; Gad2;Ai96:  $987 \pm 373$  ms,  $n = 79$  cells) and offset cells (GP4.3:  $1670 \pm 981$  ms,  $n = 41$  cells; Gad2;Ai96:  $1430 \pm 795$  ms,  $n = 8$  cells). (E) Recovery time constant ( $\tau_{\text{recovery}}$ ) for inhibited cells (GP4.3: mean  $\tau_{\text{recovery}} = 1630 \pm 1120$  ms,  $n = 148$  cells; Gad2;Ai96 mean  $\tau_{\text{recovery}} = 1990 \pm 1310$  ms,  $n = 54$  cells). Error bars in C–E represent s.d.

DOI: <https://doi.org/10.7554/eLife.49091.008>

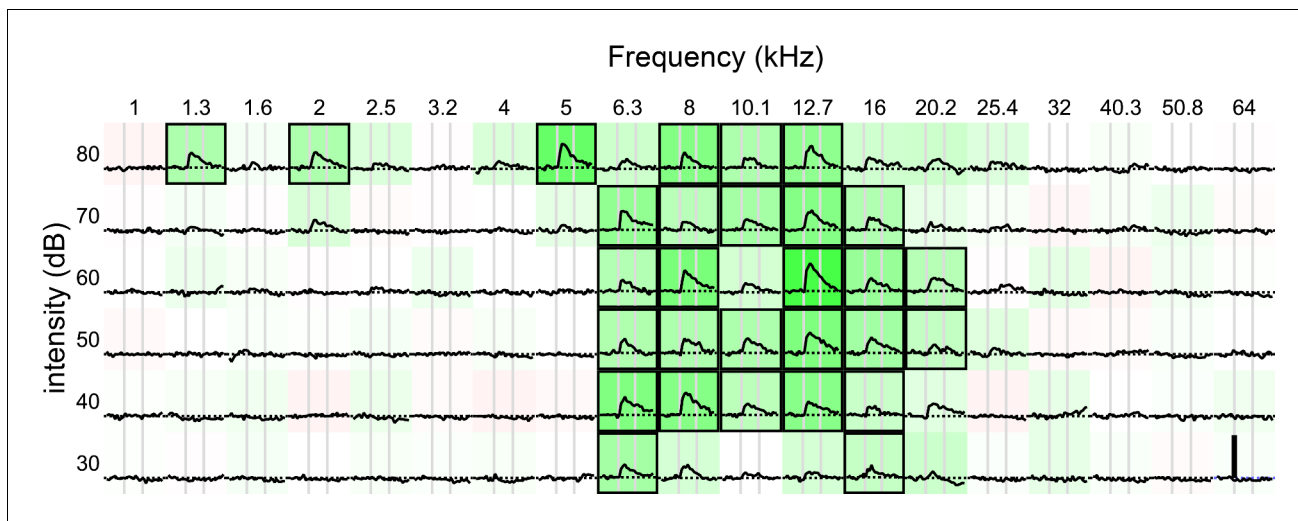

**Figure 3—figure supplement 2.** Another example FRA from a GP4.3 mouse, showing onset response and broad tuning. Vertical scale bar indicates 1  $F_b$ .

DOI: <https://doi.org/10.7554/eLife.49091.009>

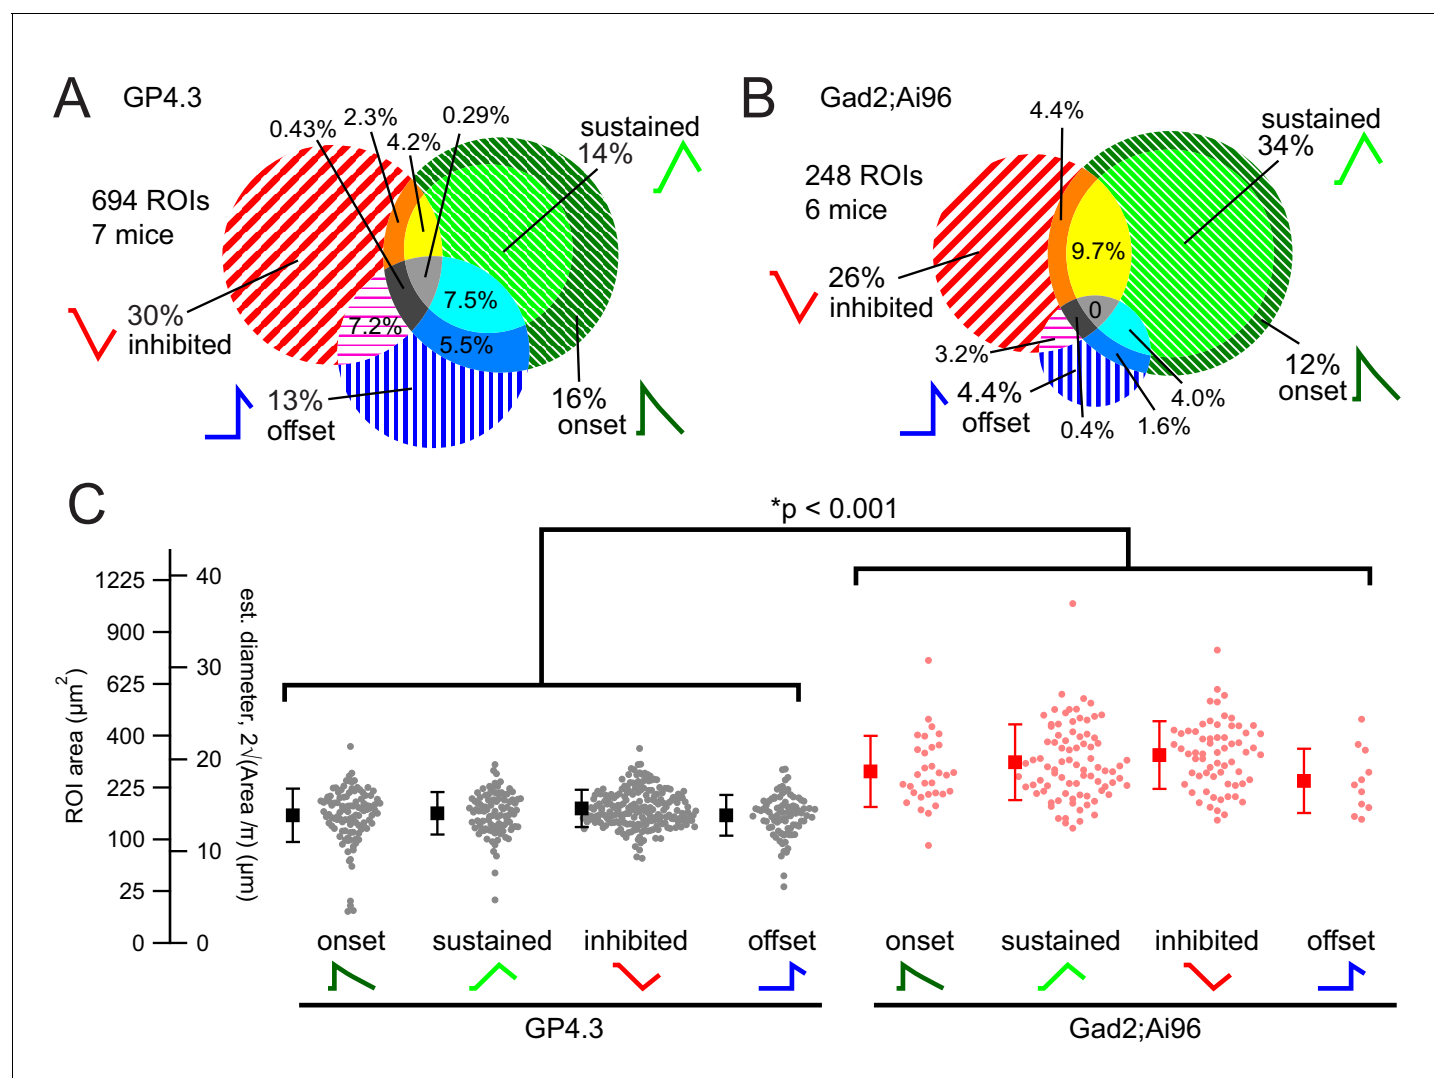

**Figure 4.** Proportion of response classes and relationship with cell size. (A–B) Proportions of response classes in GP4.3 (A) and GAD2;Ai96 animals (B). (C) Bee swarm plot and mean  $\pm$  s.d. for cell size for ROIs of different non-mixed response classes, separated by genotypes, measured as the size of the ROI (Area) in imaging experiments. Estimated diameters (d) were calculated by assuming a circular shape (i.e.  $\log(\text{CF}) = \sum_{i=0}^4 a_i r^i$ ). Cells imaged in Gad2;Ai96 mice were on average larger than those in GP4.3 mice.

DOI: <https://doi.org/10.7554/eLife.49091.011>



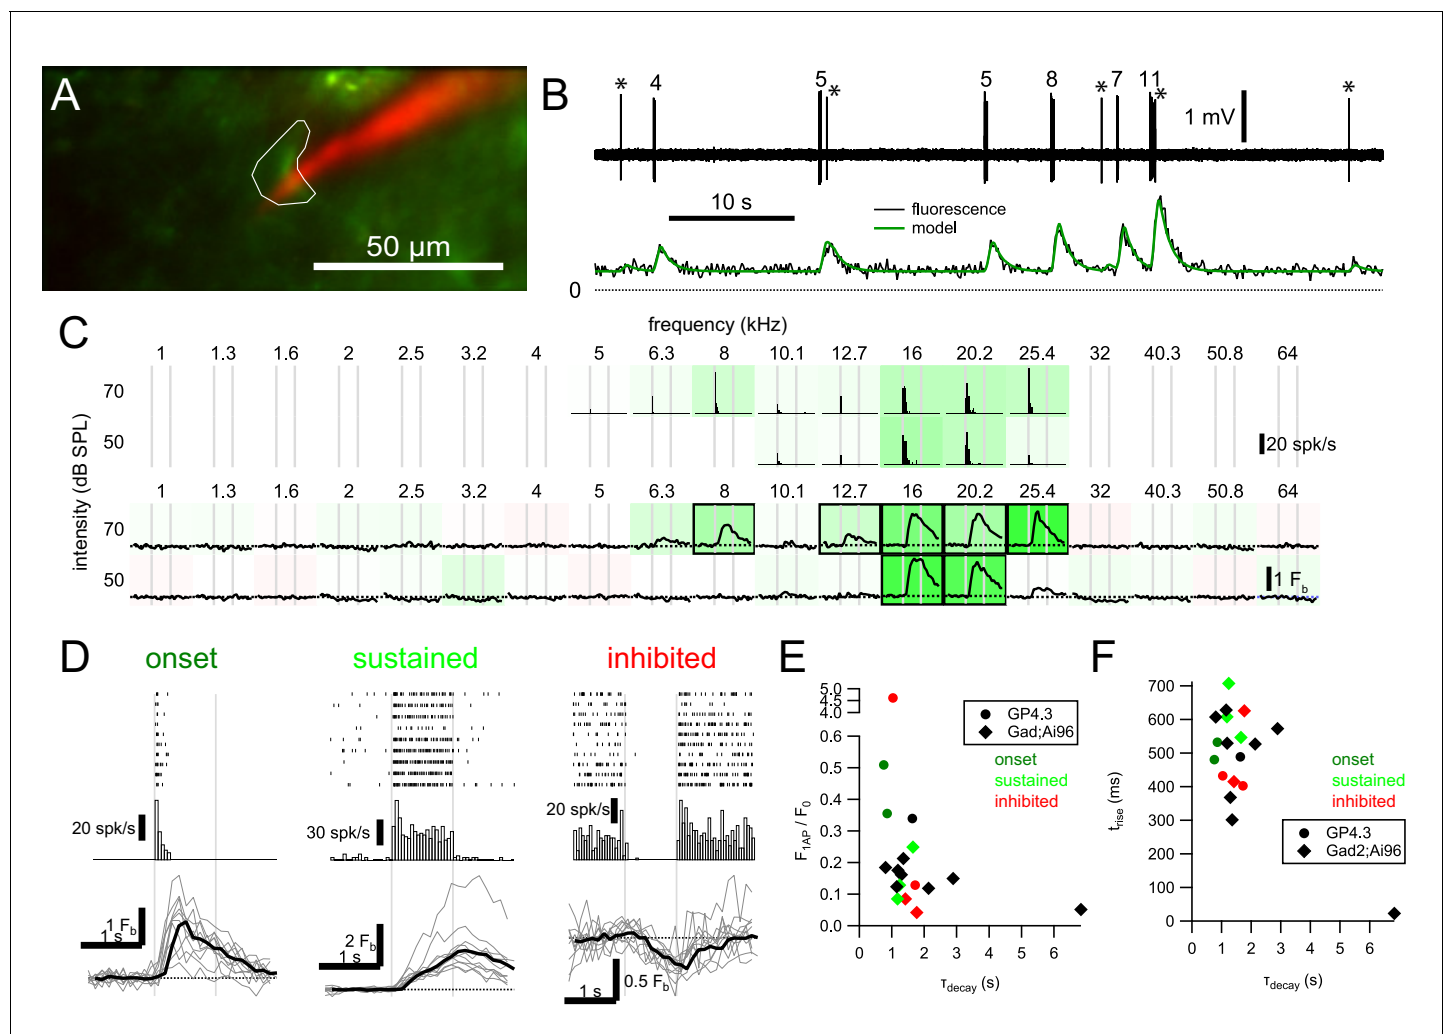

**Figure 5.** Relationship between GCaMP6s fluorescence and spikes in IC neurons. (A) Imaging of a GCaMP6s+ cell (green) in an awake GP4.3 animal with simultaneous juxtacellular recording with a pipette filled with Alexa 594 (red). (B) Spiking pattern (upper) and fluorescence (lower) of the example cell can be well related by a linear convolution of spike rate with a linear ramp, exponential decay kernel (model: green). Fit parameters:  $F_0 = 28.8$  a.u.;  $\Delta F_{1AP} = 10.2$  a.u.;  $\tau_{\text{rise}} = 532$  ms;  $\tau_{\text{decay}} = 859$  ms. Numbers above bursts indicate number of spikes, and asterisks (\*) mark single spikes. (C) Frequency tuning of the cell. Peristimulus time histogram (PSTH; upper, 50 ms bins, 10 repetitions) and mean fluorescence change of the cell in response to 1 s tone bursts. (D) Raster plots, PSTHs and fluorescence responses (mean: black; individual: gray) of an onset cell (same example as A-C), a sustained cell and an inhibited cell. Due to their rarity, we have not obtained a simultaneous recording for offset cells. (E) Relation between normalized single action potential amplitude ( $F_{1AP}/F_0$ ) and decay time constant ( $\tau_{\text{decay}}$ ). (F) Relation between rise time (zero-to-peak;  $\tau_{\text{rise}}$ ) and  $\tau_{\text{decay}}$ . Color in E and F indicate response class (red: inhibited; dark green: onset; light green: sustained; black: no tone-evoked response) of the cell.

DOI: <https://doi.org/10.7554/eLife.49091.013>

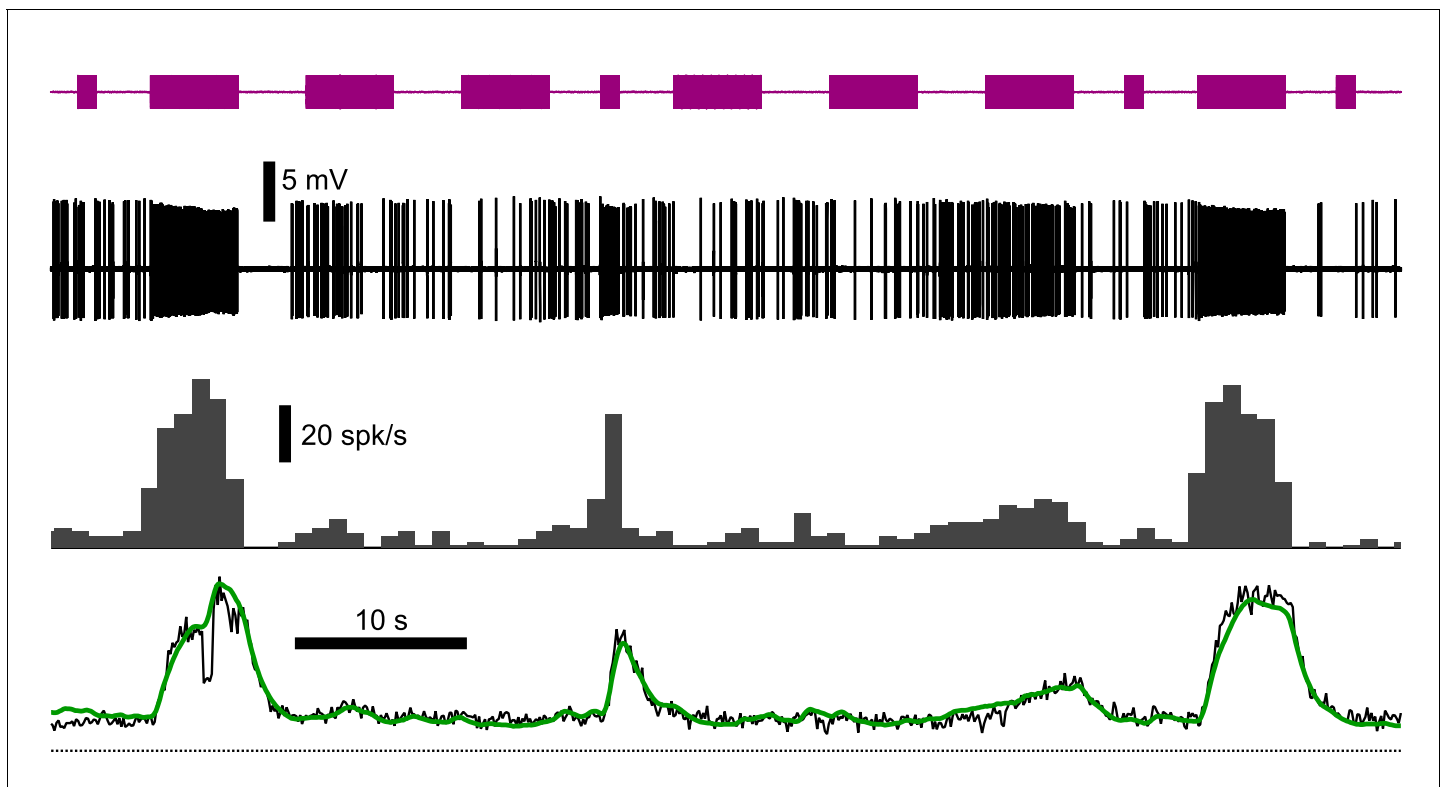

**Figure 5—figure supplement 1.** Example model fit to a cell with a sustained FRA. From top to bottom: sound stimulus (purple trace), spiking pattern (black), spike rate (gray histogram, 1 s bins) and fluorescence (black trace) of a cell from a Gad2;Ai96 animal with a sustained FRA and the model fit (green). Fit parameters:  $F_0 = 14.7$  a.u.;  $\Delta F_{1AP} = 1.25$  a.u.;  $\tau_{rise} = 607$  ms;  $\tau_{decay} = 1180$  ms. Variance explained by model: 90.9%. Cell id: a11958\_04\_c5. DOI: <https://doi.org/10.7554/eLife.49091.014>

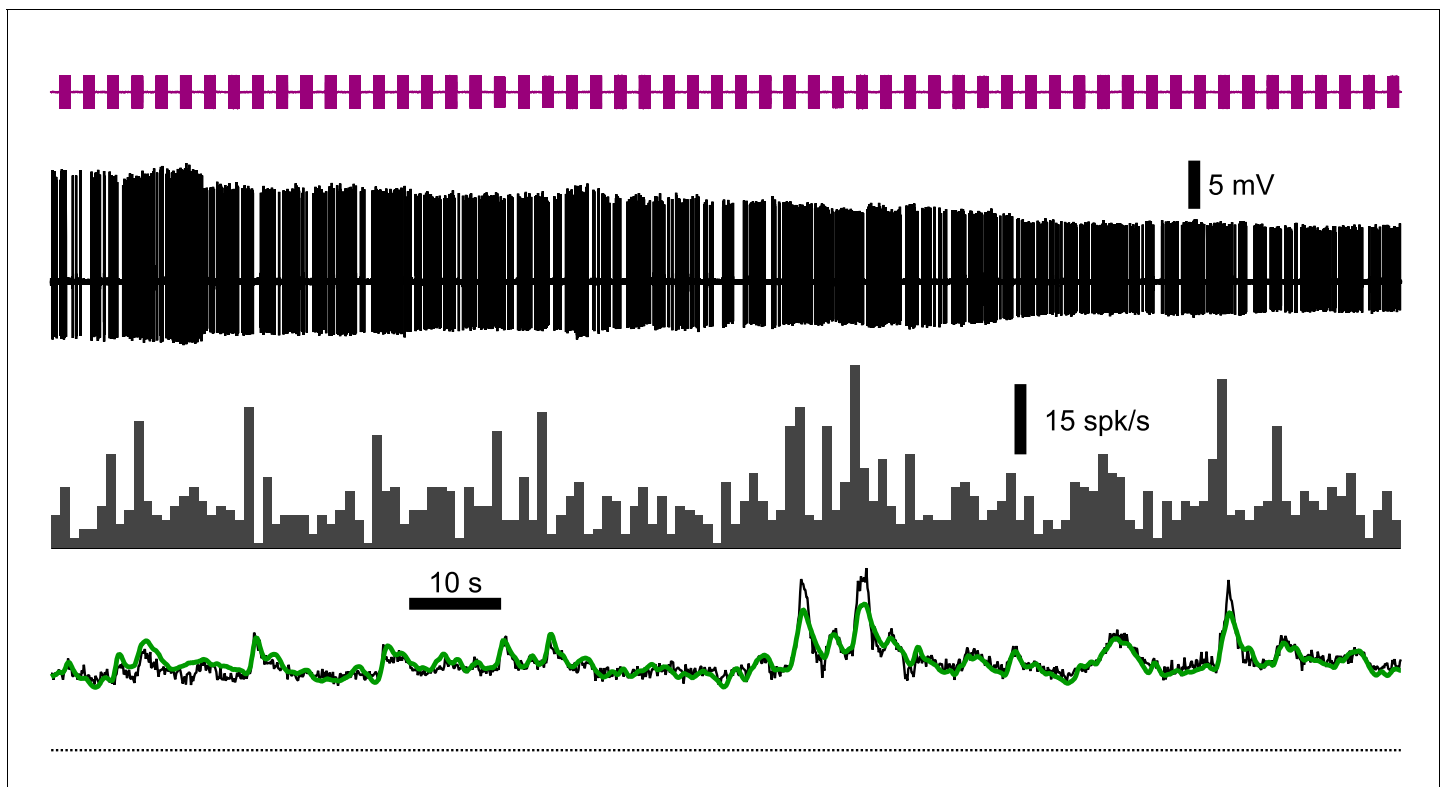

**Figure 5—figure supplement 2.** Example model fit to a cell with an inhibited FRA. From top to bottom: sound stimulus (purple trace), spiking pattern (black), spike rate (gray histogram, 1 s bins) and fluorescence (black trace) of a cell from a Gad2;Ai96 animal with an inhibited FRA and the model fit (green). Fit parameters:  $F_0 = 44.3$  a.u.;  $\Delta F_{1AP} = 1.85$  a.u.;  $\tau_{rise} = 626$  ms;  $\tau_{decay} = 1770$  ms. Variance explained by model: 79.4%. Cell id: a11958\_04\_c6. DOI: <https://doi.org/10.7554/eLife.49091.015>



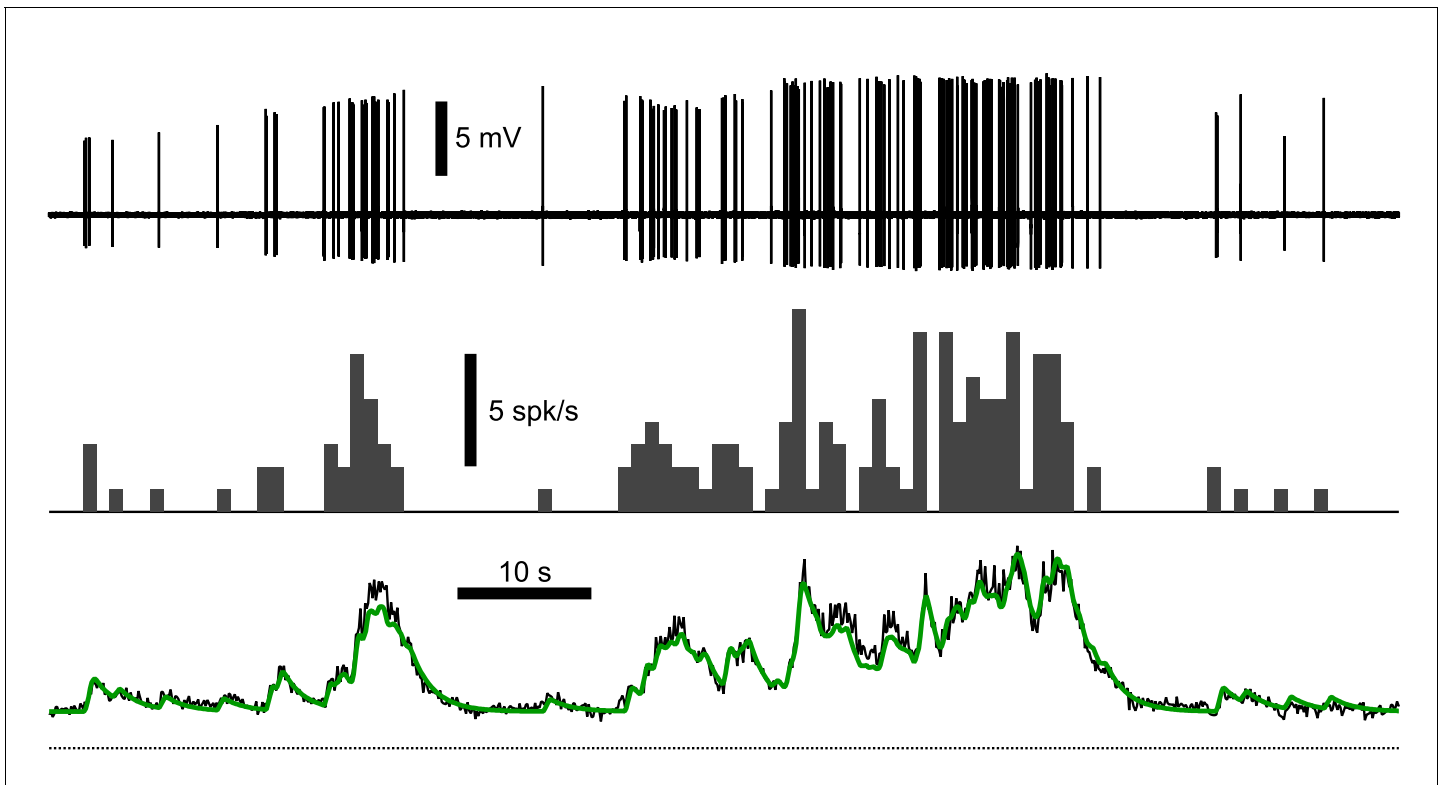

**Figure 5—figure supplement 3.** Example model fit to spontaneous activity of a cell. From top to bottom: spiking pattern (black), spike rate (gray histogram, 1 s bins) and fluorescence (black trace) of a spontaneously active cell from a GP4.3 animal and the model fit (green). Fit parameters:  $F_0 = 66.2$  a.u.;  $\Delta F_{1AP} = 22.5$  a.u.;  $\tau_{rise} = 489$  ms;  $\tau_{decay} = 1640$  ms. Variance explained by model: 93.0%. Cell id: a11814\_08\_c5.

DOI: <https://doi.org/10.7554/eLife.49091.016>

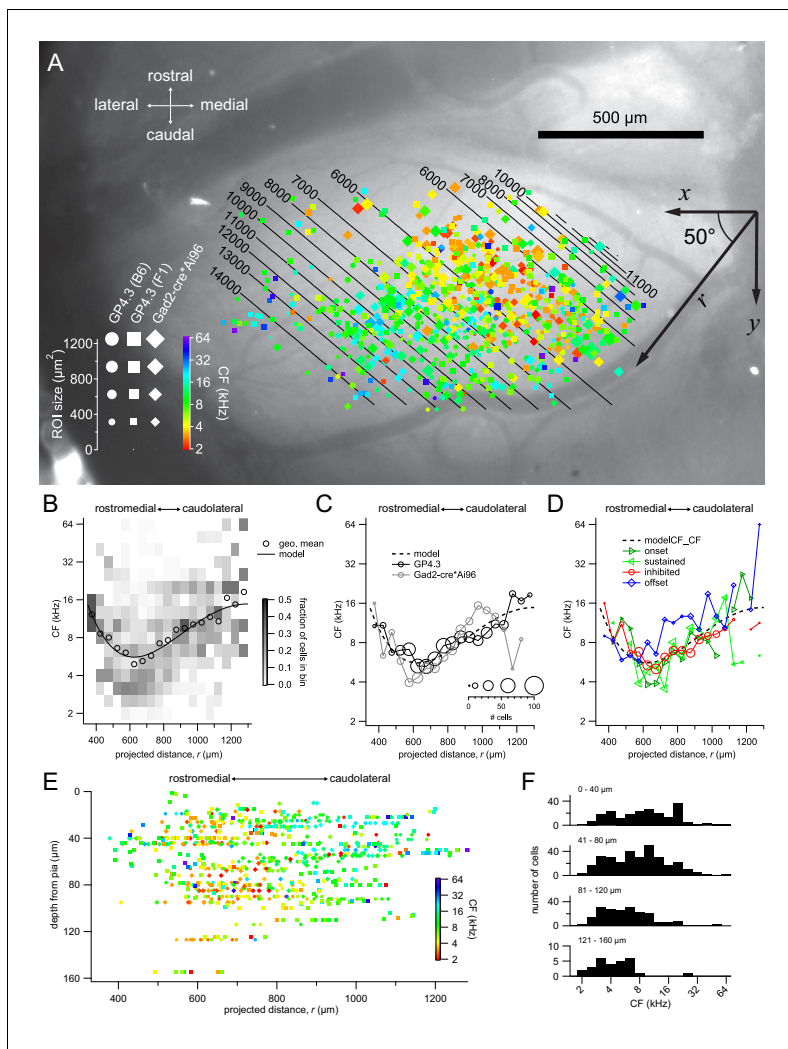

**Figure 6.** Tonotopic organization. (A) Combined spatial distribution of characteristic frequencies (CFs) in the two transgenic lines, aligned to the same top-down image of an exposed left IC. Symbol size represents the size of the ROI, while colors indicate different CFs. Cells from Gad2;Ai96 mice were marked by diamonds. For GP4.3, the shape of the symbol represents ROIs from C57BL/6J (circles) or B6CBAF1 (squares) background. To capture a direction of tonotopy, CF was fitted with a 4<sup>th</sup>-order polynomial  $r = x \cos\theta + y \sin\theta$  where  $r$  is a presumed direction of tonotopy at an angle  $\theta$  (i.e.  $r = x \cos\theta + y \sin\theta$ ), with the origin being the contact point between superior and inferior colliculi at the midline. The best fit yielded an angle  $\theta$  of 50° from the medial-lateral axis. Contour lines indicate the predicted CF of the fit. (B) Geometric mean (open circles) and probability distribution (background shading) of CF along the 50° line, in 75 µm bins. Black trace shows the fitted 4<sup>th</sup>-order polynomial. (C) Geometric mean of CF along the 50° line for the GP4.3 (black) and Gad2-cre\*Ai96 (gray) lines. Size of symbol represent number of cells in each 75 µm bin. (D) Geometric mean of CF for cells of onset, sustained, inhibited or offset FRAs. (E) Depth dependence of CFs along the 50° line. (F) Histogram of CF grouped according to depth from pia surface. Note that low CF cells are present at all imaging depths.

DOI: <https://doi.org/10.7554/eLife.49091.018>

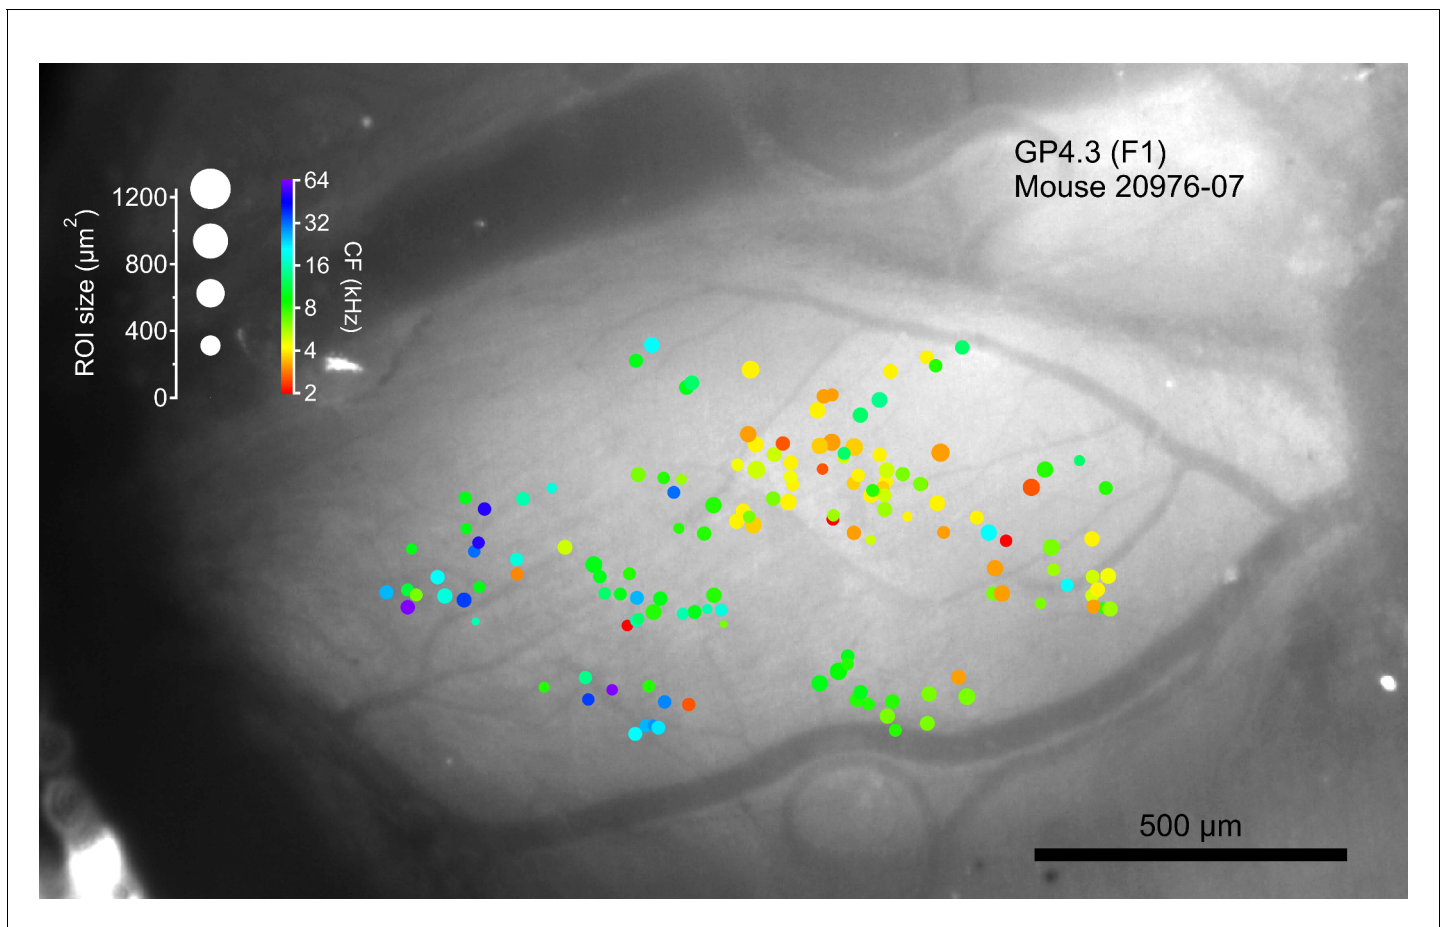

**Figure 6—figure supplement 1.** Tonotopic organization of a single GP4.3 animal (Mouse 20976-07; B6CBAF1/J background), registered to widefield image in **Figure 6A**.

DOI: <https://doi.org/10.7554/eLife.49091.019>



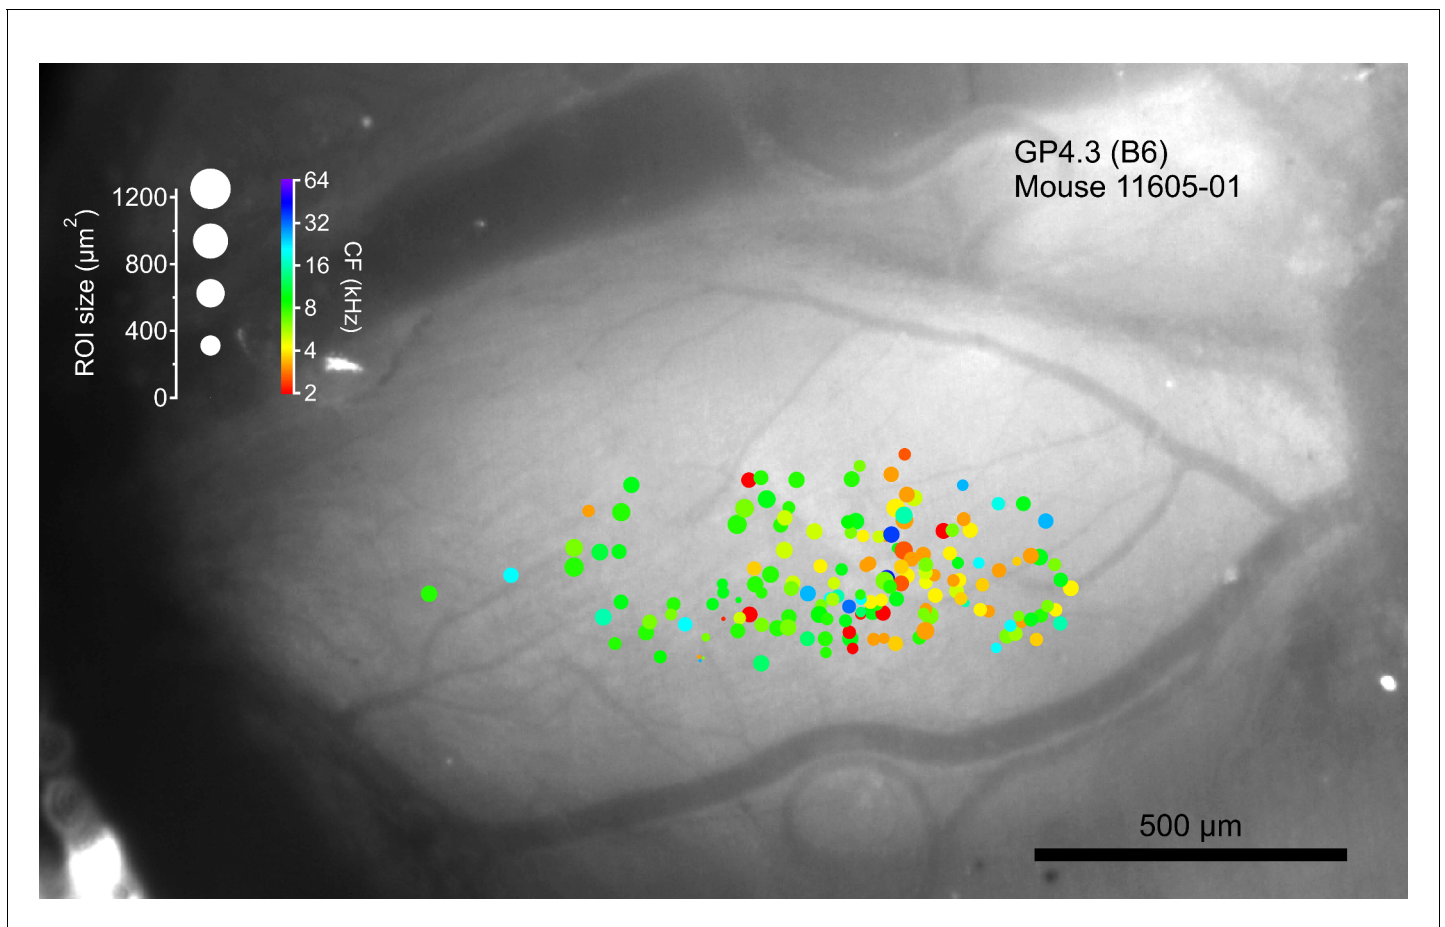

**Figure 6—figure supplement 2.** Tonotopic organization of a single GP4.3 animal (Mouse 11605-01; C57BL/6J background), registered to widefield image in **Figure 6A**.

DOI: <https://doi.org/10.7554/eLife.49091.020>

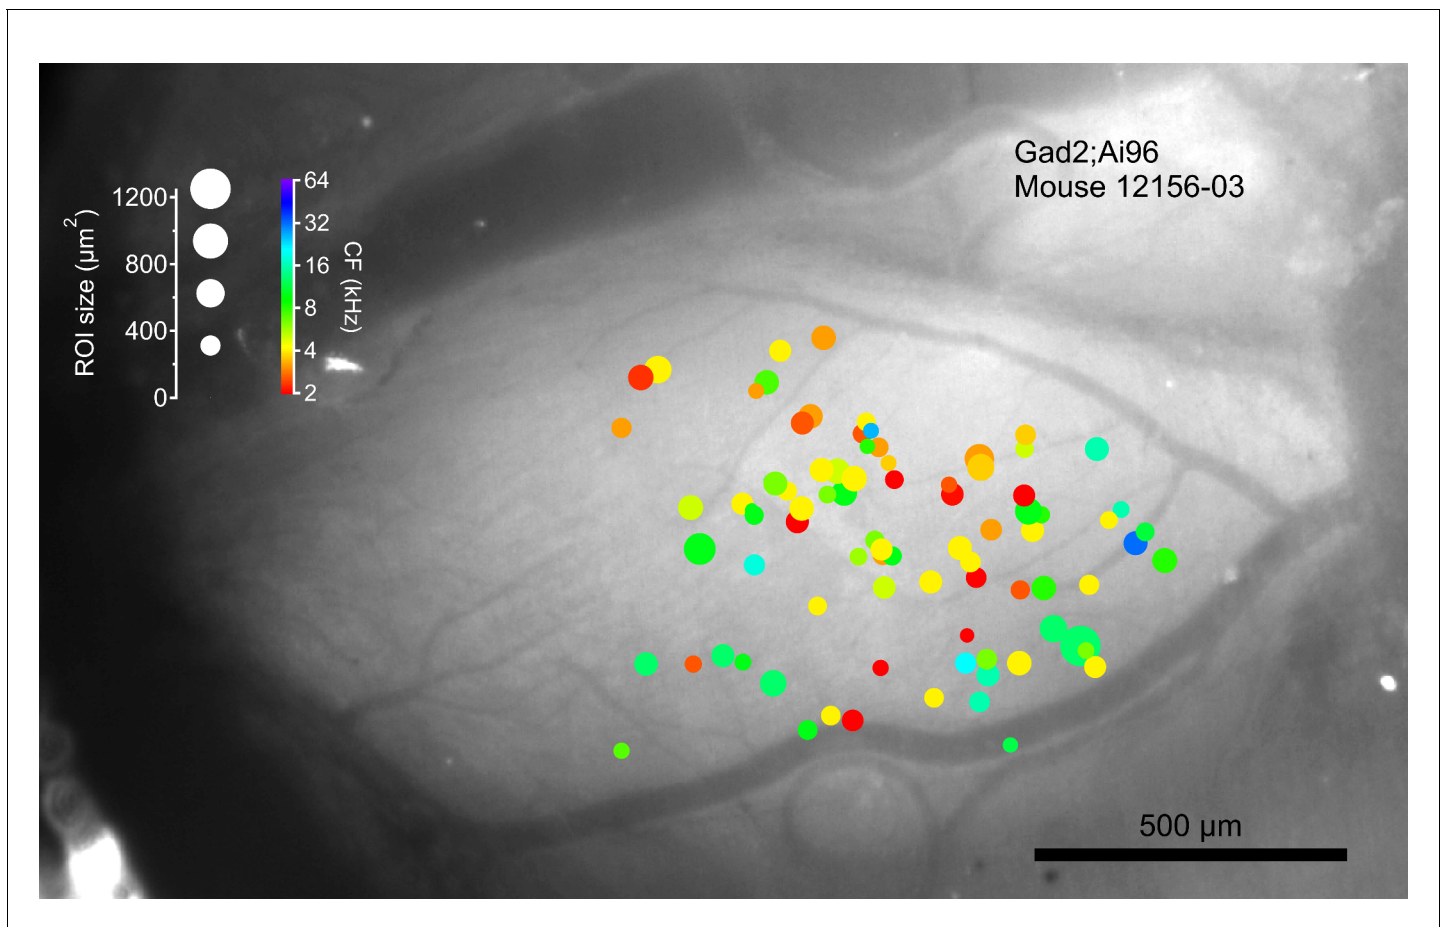

**Figure 6—figure supplement 3.** Tonotopic organization of a single Gad2;Ai96 animal (Mouse 12156-03), registered to widefield image in **Figure 6A**.  
DOI: <https://doi.org/10.7554/eLife.49091.021>

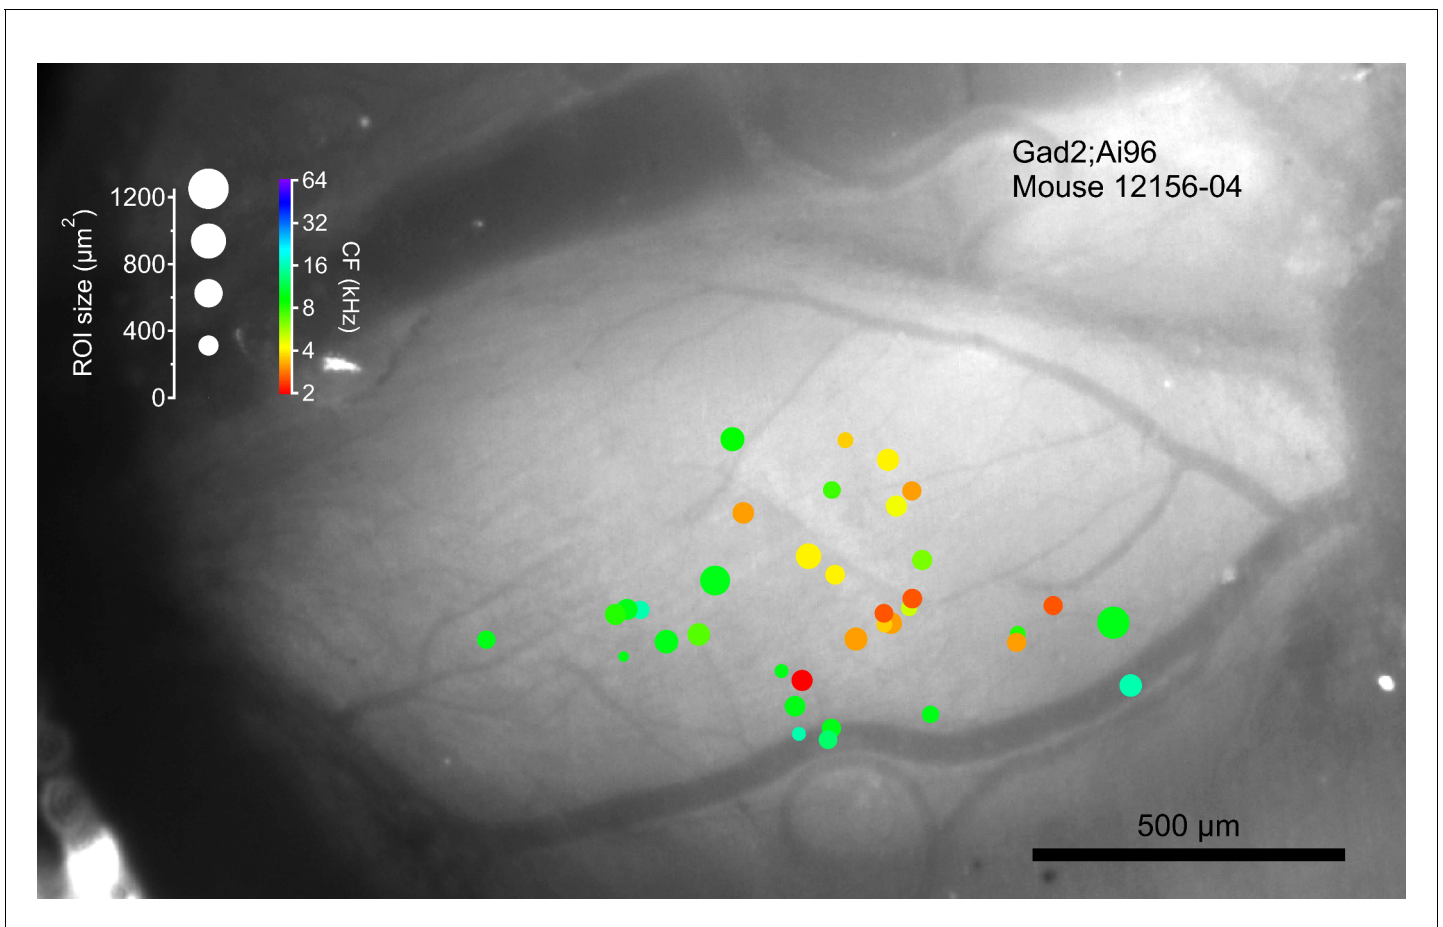

**Figure 6—figure supplement 4.** Tonotopic organization of a single Gad2;Ai96 animal (Mouse 12156-04), registered to widefield image in **Figure 6A**. Same animal as **Figure 9A**.

DOI: <https://doi.org/10.7554/eLife.49091.022>

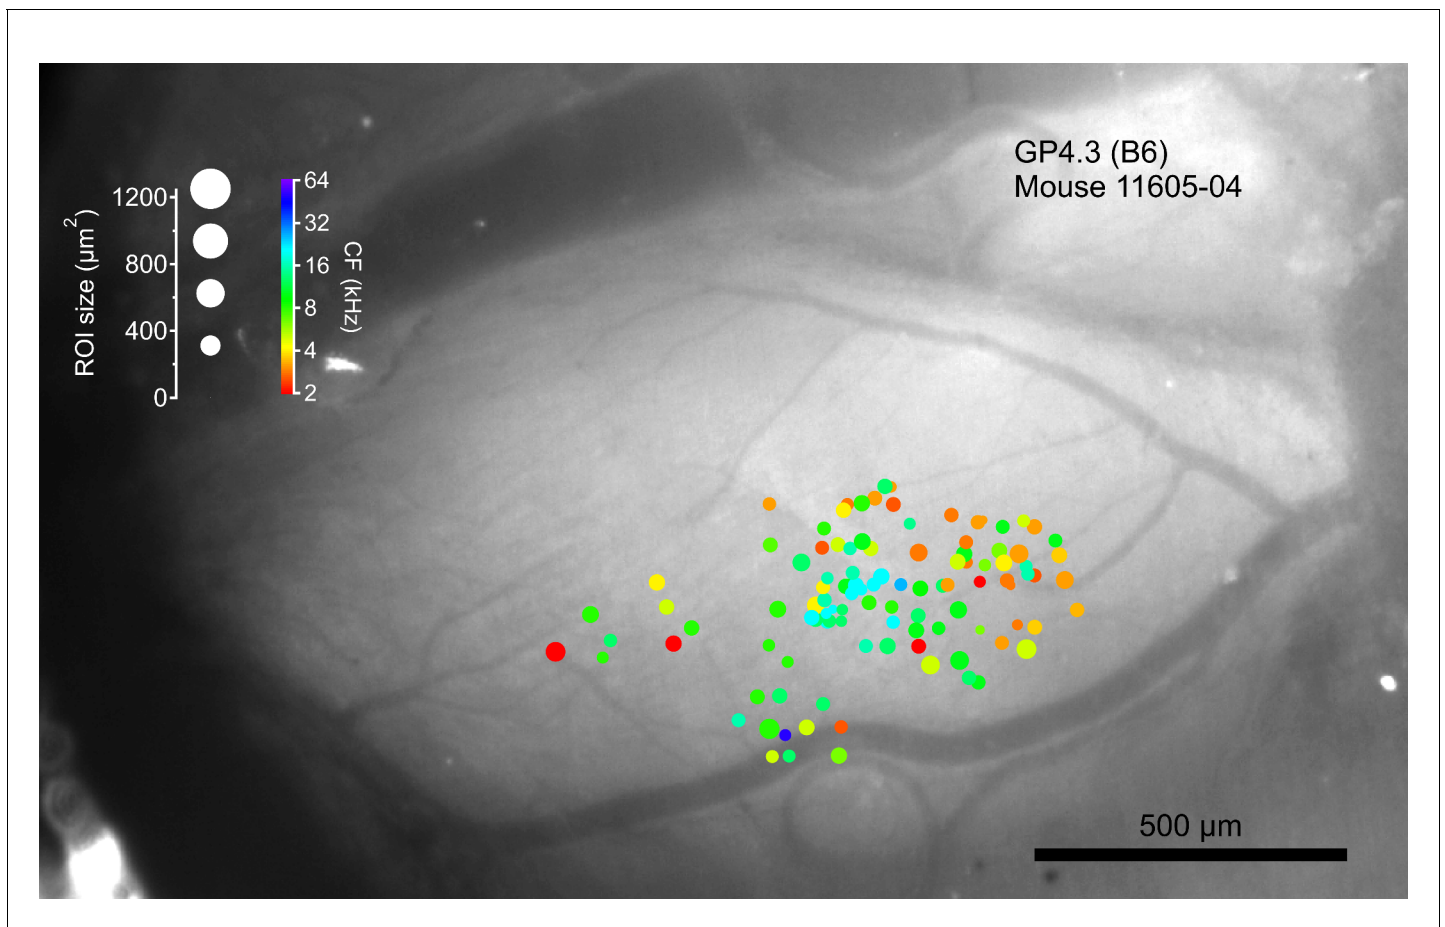

**Figure 6—figure supplement 5.** Tonotopic organization of a single GP4.3 animal (Mouse 11605-04; C57BL/6J background), registered to widefield image in **Figure 6A**. Same animal as **Figure 9E**.

DOI: <https://doi.org/10.7554/eLife.49091.023>

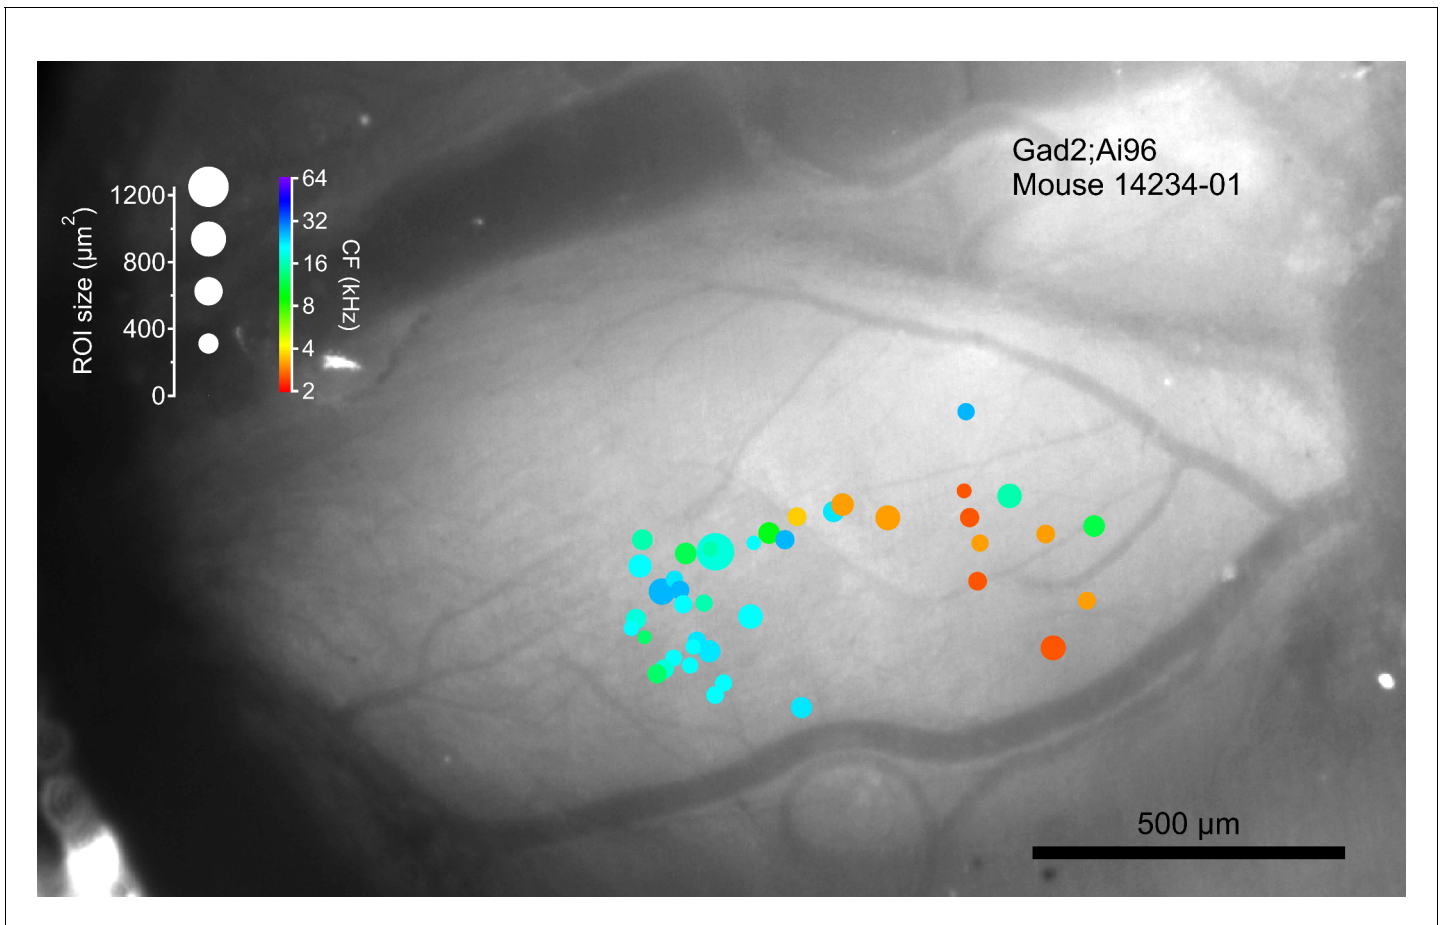

**Figure 6—figure supplement 6.** Tonotopic organization of a single Gad2;Ai96 animal (Mouse 14234-01), registered to widefield image in **Figure 6A**.  
DOI: <https://doi.org/10.7554/eLife.49091.024>

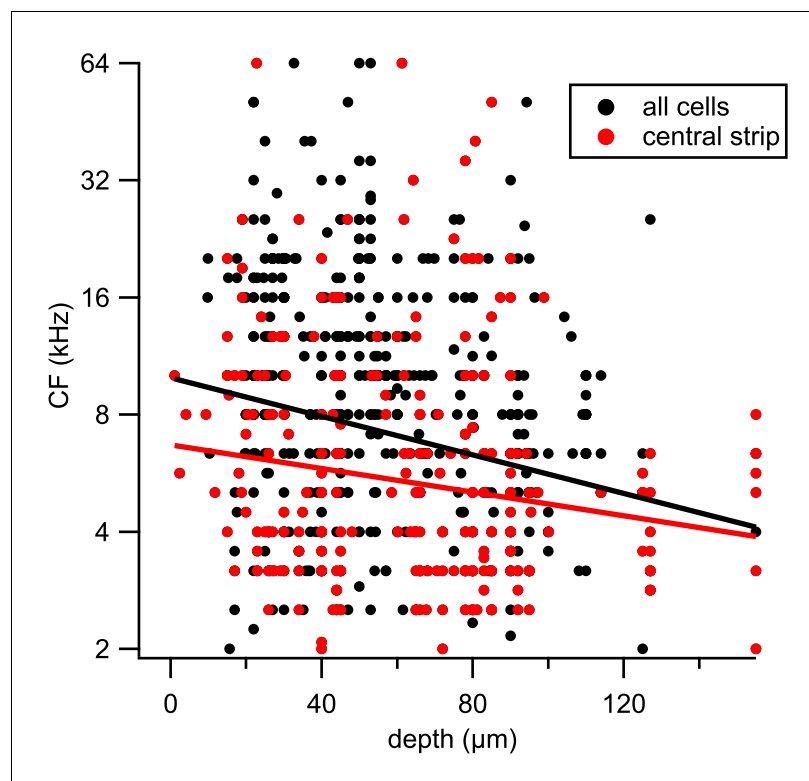

**Figure 6—figure supplement 7.** Relationship between CF and depth of cell. Scatter plot of CF against depth of each ROI from pia surface. Black: all cells; red: cells within the central strip,  $r = 525\text{--}725\ \mu\text{m}$ . Solid lines represent regression lines for the two data sets.

DOI: <https://doi.org/10.7554/eLife.49091.025>



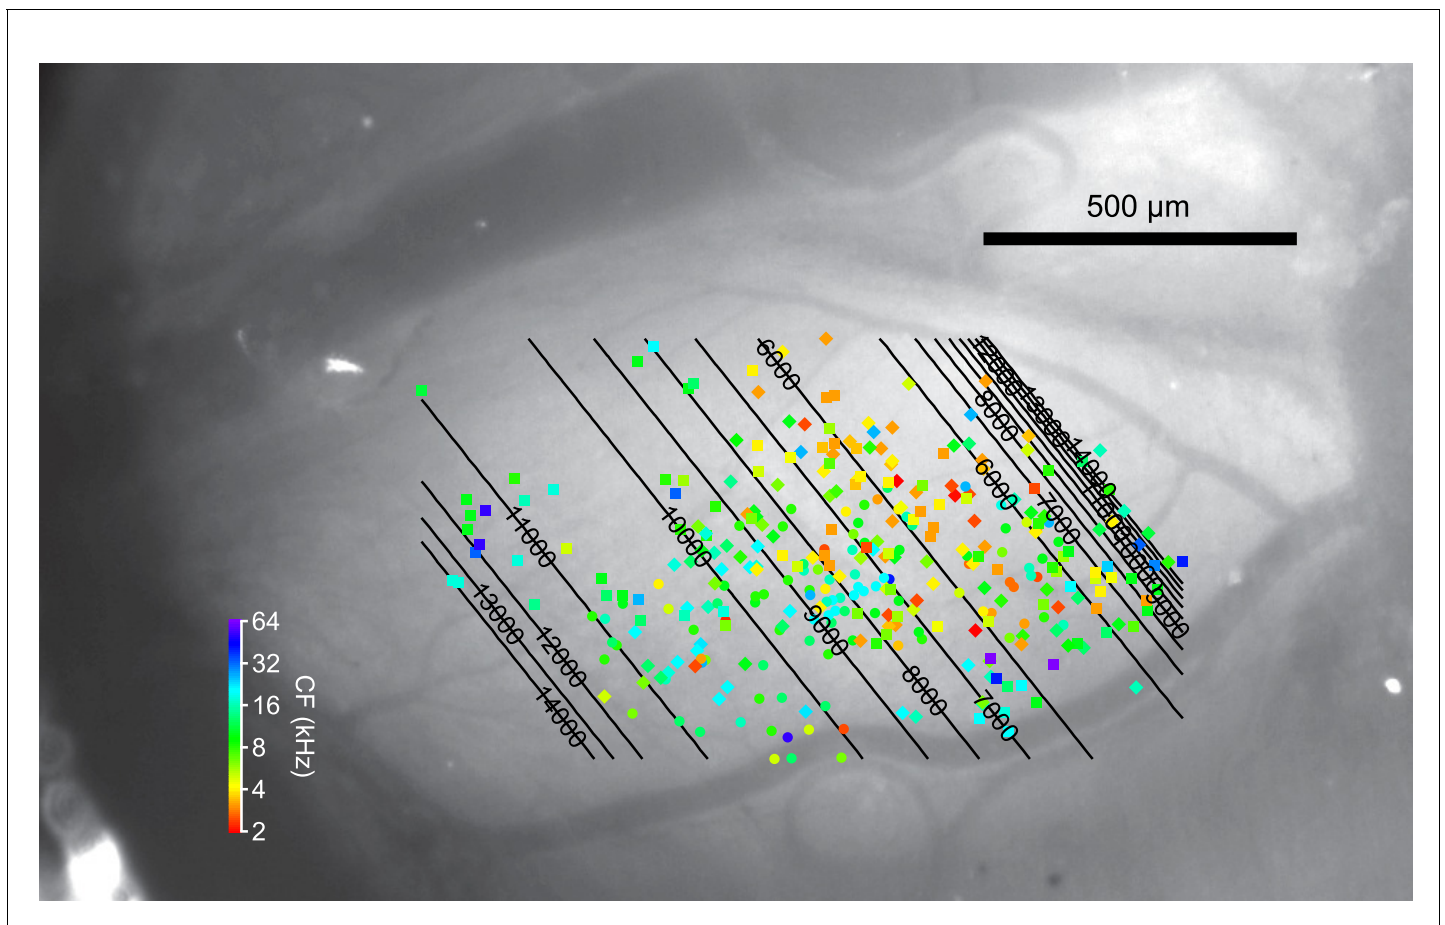

**Figure 6—figure supplement 8.** Tonotopic organization of the most superficial cells. Combined spatial distribution of characteristic frequencies (CFs) for cells within 50  $\mu\text{m}$  of the pia surface in the two transgenic lines, aligned to the same top-down image of an exposed left IC. Symbol size represents the size of the ROI, while colors indicate CFs. Cells from Gad2;Ai96 mice were marked by diamonds. For GP4.3, the shape of the symbol represents ROIs from C57BL/6J (circles) or B6CBAF1 (squares) background. A 4<sup>th</sup>-order polynomial fit of the superficial cells also yielded a double gradient.  
DOI: <https://doi.org/10.7554/eLife.49091.026>

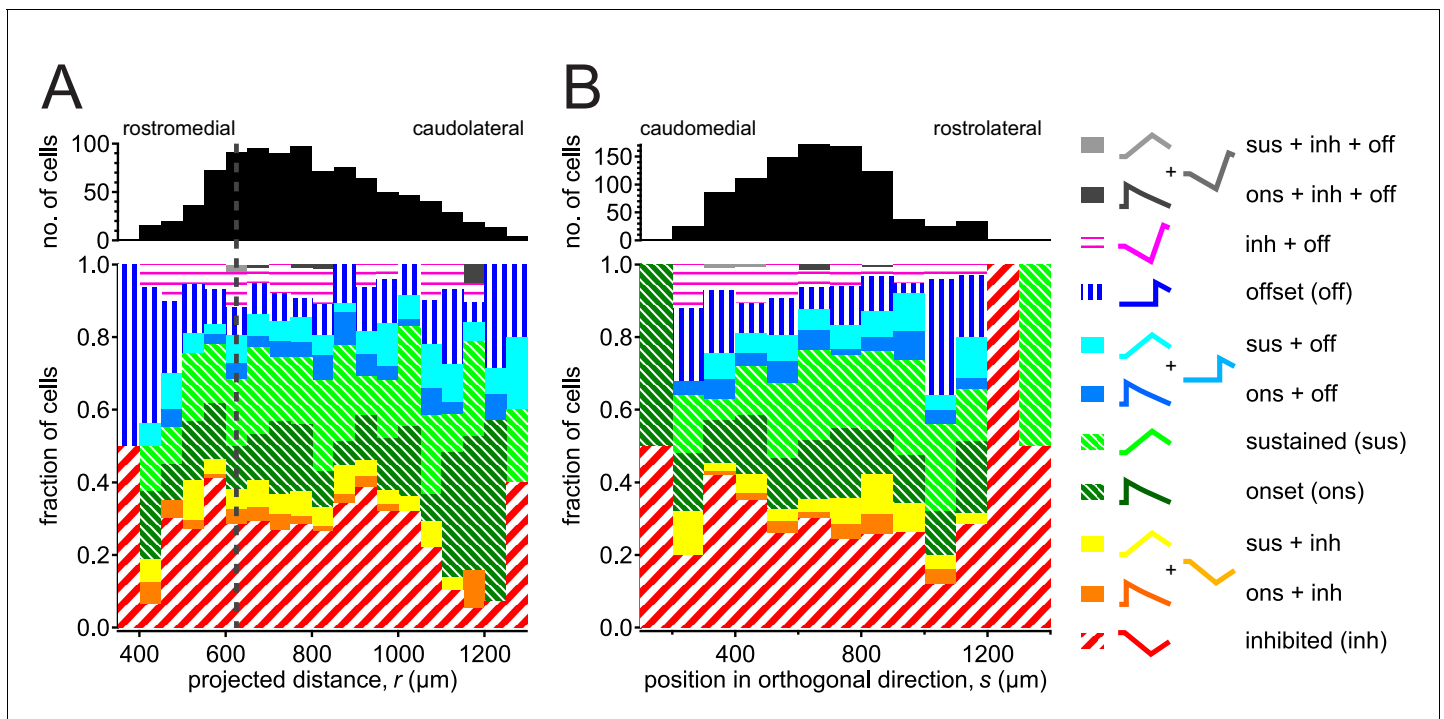

**Figure 7.** Spatial organization of response classes. Similar proportions of response classes along (A) the presumed tonotopic axis (bin size  $50\ \mu\text{m}$ ) and (B) the direction orthogonal to the axis (bin size  $100\ \mu\text{m}$ ). Zero position was taken as the contact point between superior and inferior colliculi at the midline. Vertical dashed line in (A) denotes the minimal CF position based on our polynomial fit ( $625\ \mu\text{m}$ ).

DOI: <https://doi.org/10.7554/eLife.49091.029>

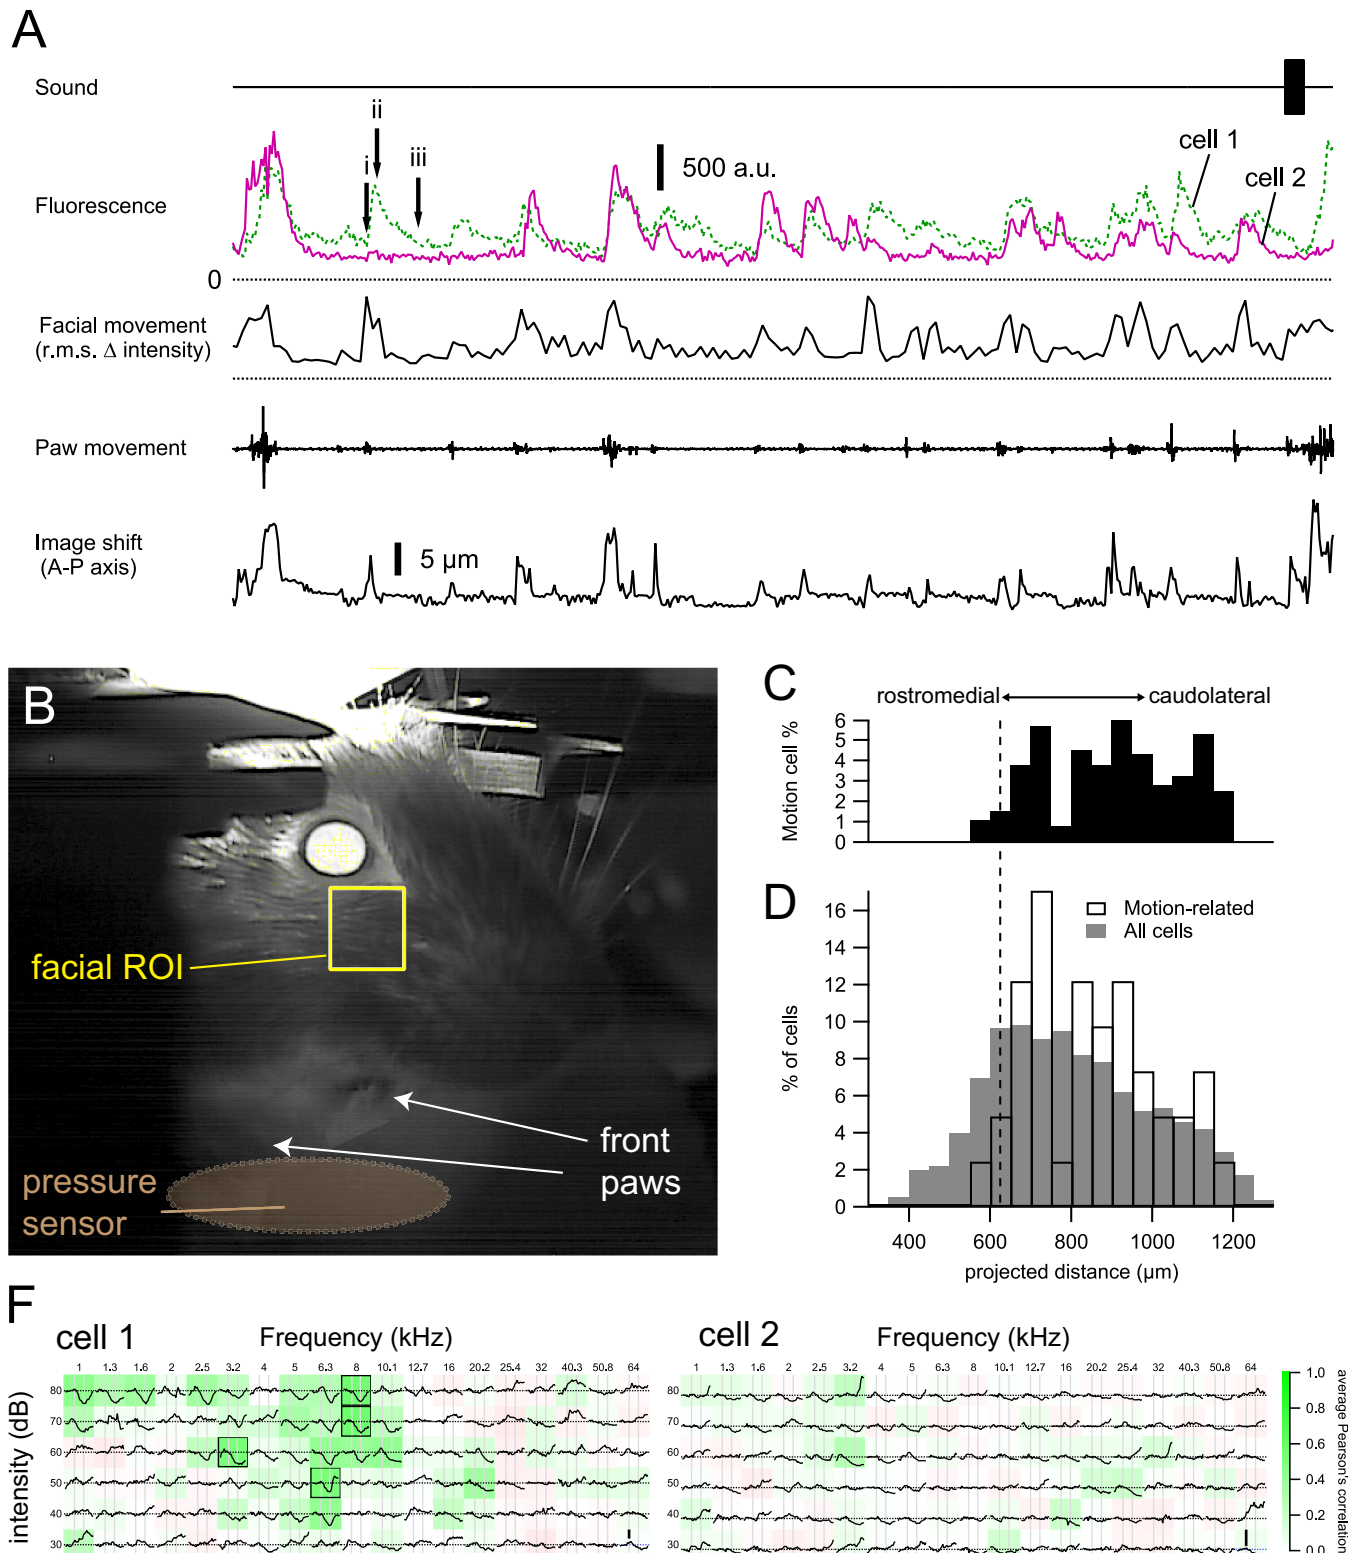

**Figure 8.** Cells with motion-related responses. (A) Two example cells that were spontaneously active in the absence of sound presentation. Calcium transients occurred when the animal was moving its paws or showing facial movement (e.g. whisking). These transients decayed much more slowly than

*Figure 8 continued on next page*

*Figure 8 continued*

motion artefacts (image shifts, bottom trace; see also **Figure 8—figure supplement 1**). (B) Facial movements were quantified from a simultaneously recorded video of the animal by calculating the root-mean-square of the changes in pixel intensity between consecutive frames of a rectangular area at the whisker pad. (C–D) Cells showing motion-related activity were predominantly located in the caudolateral part of the dorsal IC. Broken line indicates the minimum CF position obtained from the polynomial fit. (F) The motion-related calcium transients were unlikely to be caused by sounds, as the two cells showed either an inhibitory FRA (cell 1) or no clear tone-evoked response (cell 2).

DOI: <https://doi.org/10.7554/eLife.49091.031>

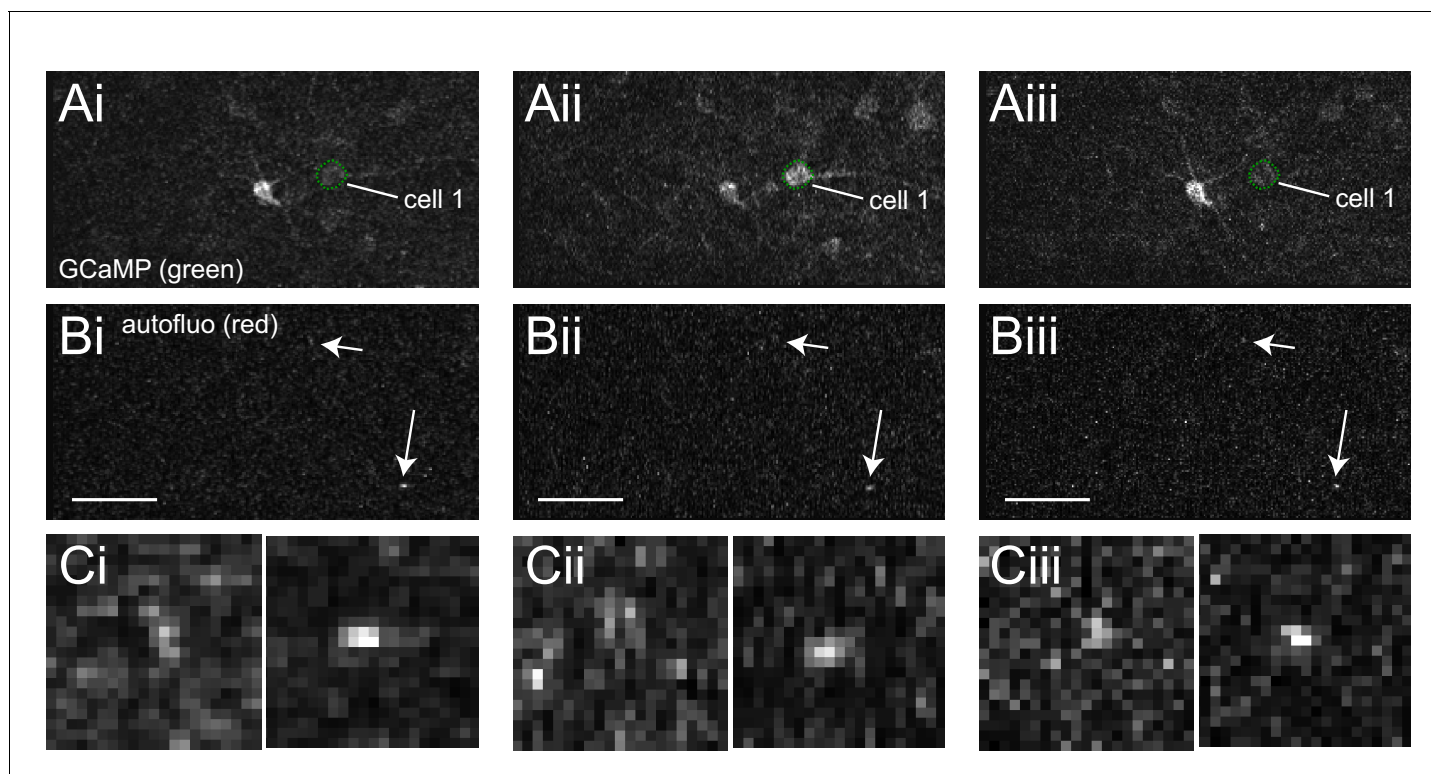

**Figure 8—figure supplement 1.** Evidence that the motion-related responses were not due to motion artefacts in imaging. Vertical or horizontal blurring was due to subpixel image registration. (A) Single image frame for GCaMP fluorescence from experiment in **Figure 8**, i-iii corresponds to frames marked in **Figure 8A**. (B) Autofluorescence in red channel for the same frames in A. Arrows point to two autofluorescence spots, both of which remained in focus during this period. (C) Enlarged image of the two autofluorescence spots for the three frames.

DOI: <https://doi.org/10.7554/eLife.49091.032>



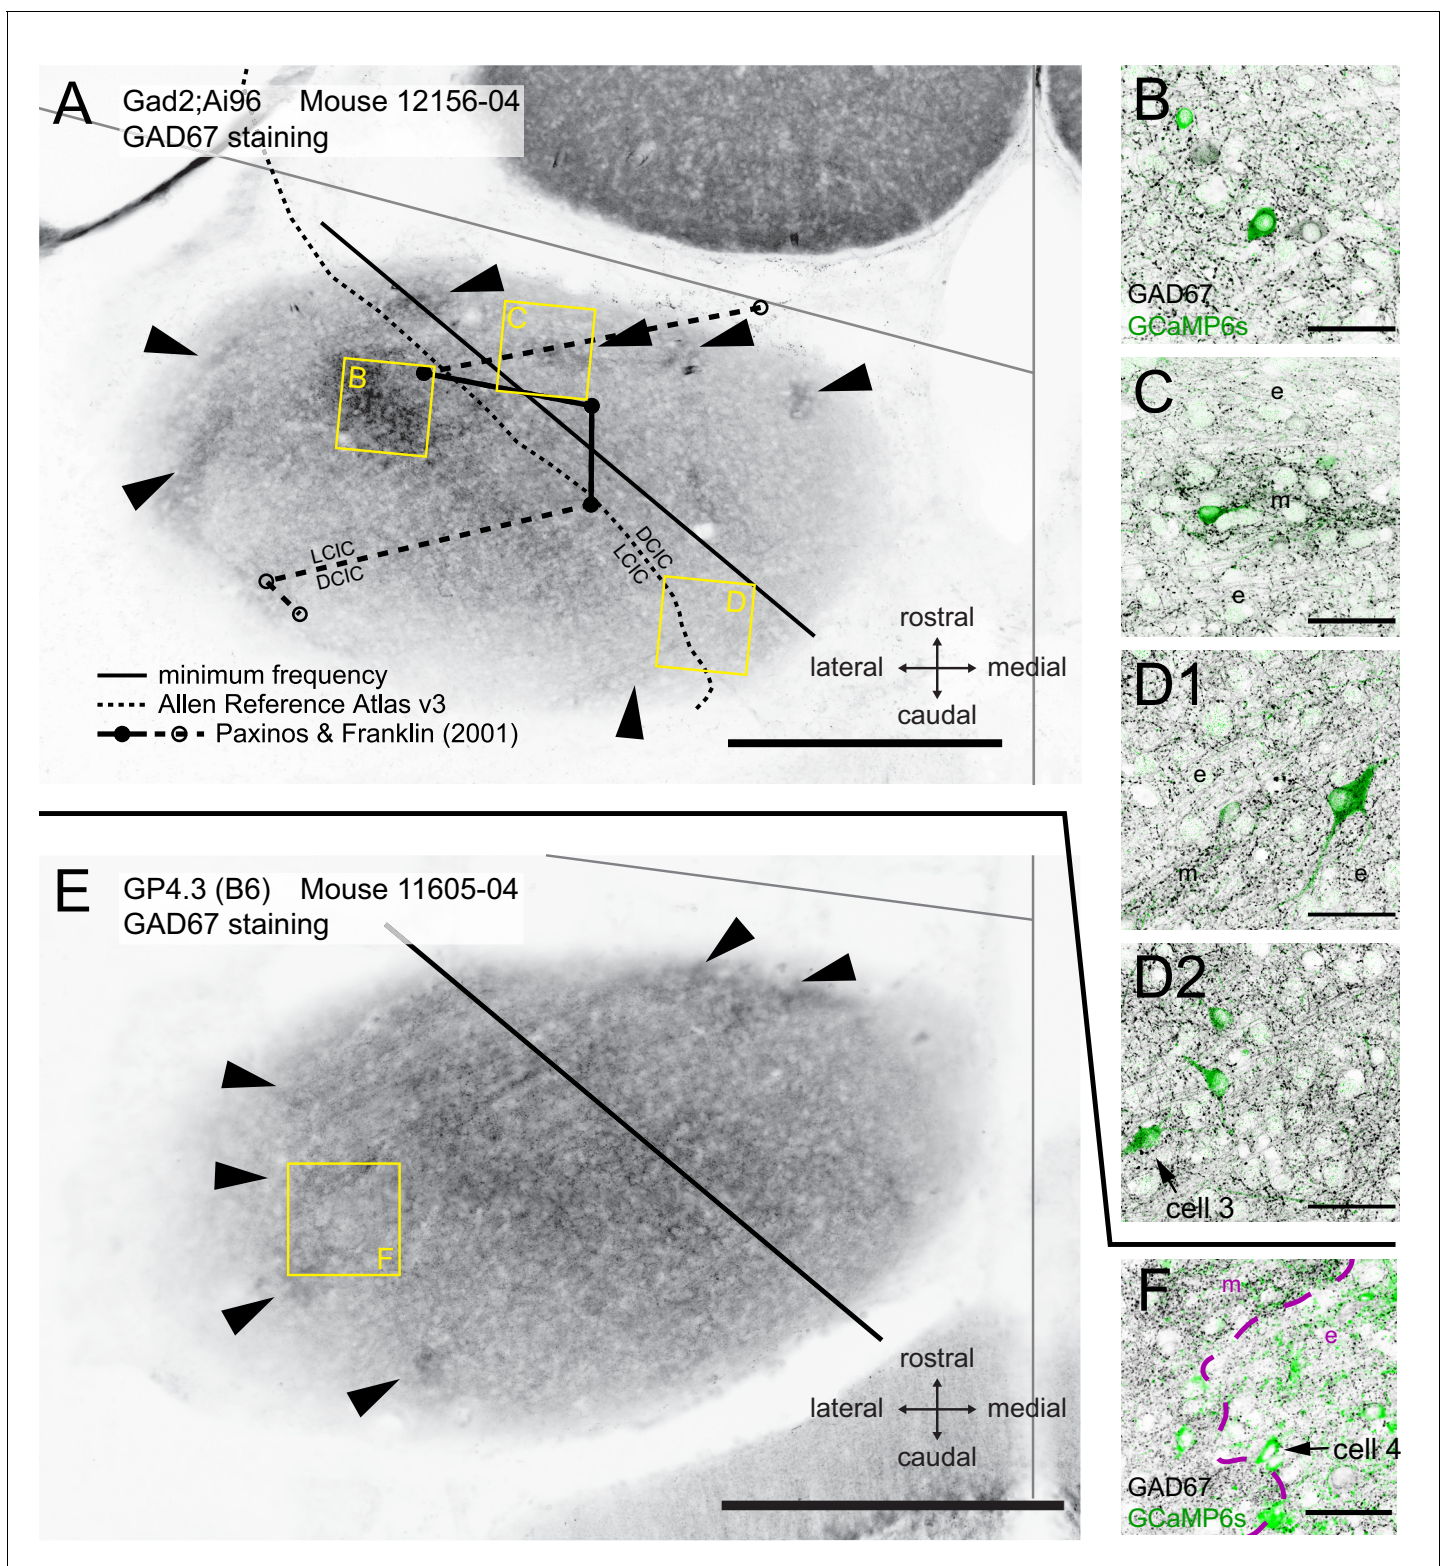

**Figure 9.** Comparison of tonotopic organization with histological data and literature. (A) Epifluorescence image of the IC in a horizontal brain section stained for GAD67. This brain slice was from a Gad2;Ai96 mouse after two-photon imaging. Black straight line indicates the minimum frequency location derived from fitting two-photon imaging data. Dashed curve represents the demarcation between the dorsal and the lateral (external) cortices traced from version 3 of the Allen Reference Atlas. Circles connected with solid and broken lines mark the demarcation at the dorsal brain surface traced from the atlas by *Paxinos and Franklin (2001)*. The rostral and caudal end of this demarcation are marked by a dashed line because at the

*Figure 9 continued on next page*



*Figure 9 continued*

indicated positions on the anterior-posterior axis the whole structure was labeled as LCIC or DCIC, respectively. Modules with dense GAD67 staining, considered to be a hallmark for the LCIC, were observed both medially and laterally from each of the three demarcations (arrowheads). We observed a region in the center of the IC whose GAD67 staining density was at least as strong as in the neurochemical modules (square labeled B). (B–D) Single confocal optical sections of GAD67 (black) and GCaMP6s (green) staining in different areas of the brain slice corresponding to the yellow squares in A. (B) Dense GAD67 area in the central region of the IC (<80  $\mu\text{m}$  from dorsal surface). (C) An area showing a GAD67-dense module (m) in the center, cut transversely and surrounded by extramodular region (e) with sparse GAD67 staining. (D1–2) Optical sections at different focal depths of an area showing another GAD67 module from the same slice (m), cut tangentially. Arrow in D2 indicates a cell showing motion-related responses. (E) Similar to A but from an imaged GP4.3 mouse. (F) Single confocal section for GCaMP6s (green) and GAD67 (black) staining in region marked in E. Arrow marks another cell with motion-related response. Scale bars, A,E: 500  $\mu\text{m}$ ; B–D,F: 50  $\mu\text{m}$ .

DOI: <https://doi.org/10.7554/eLife.49091.034>

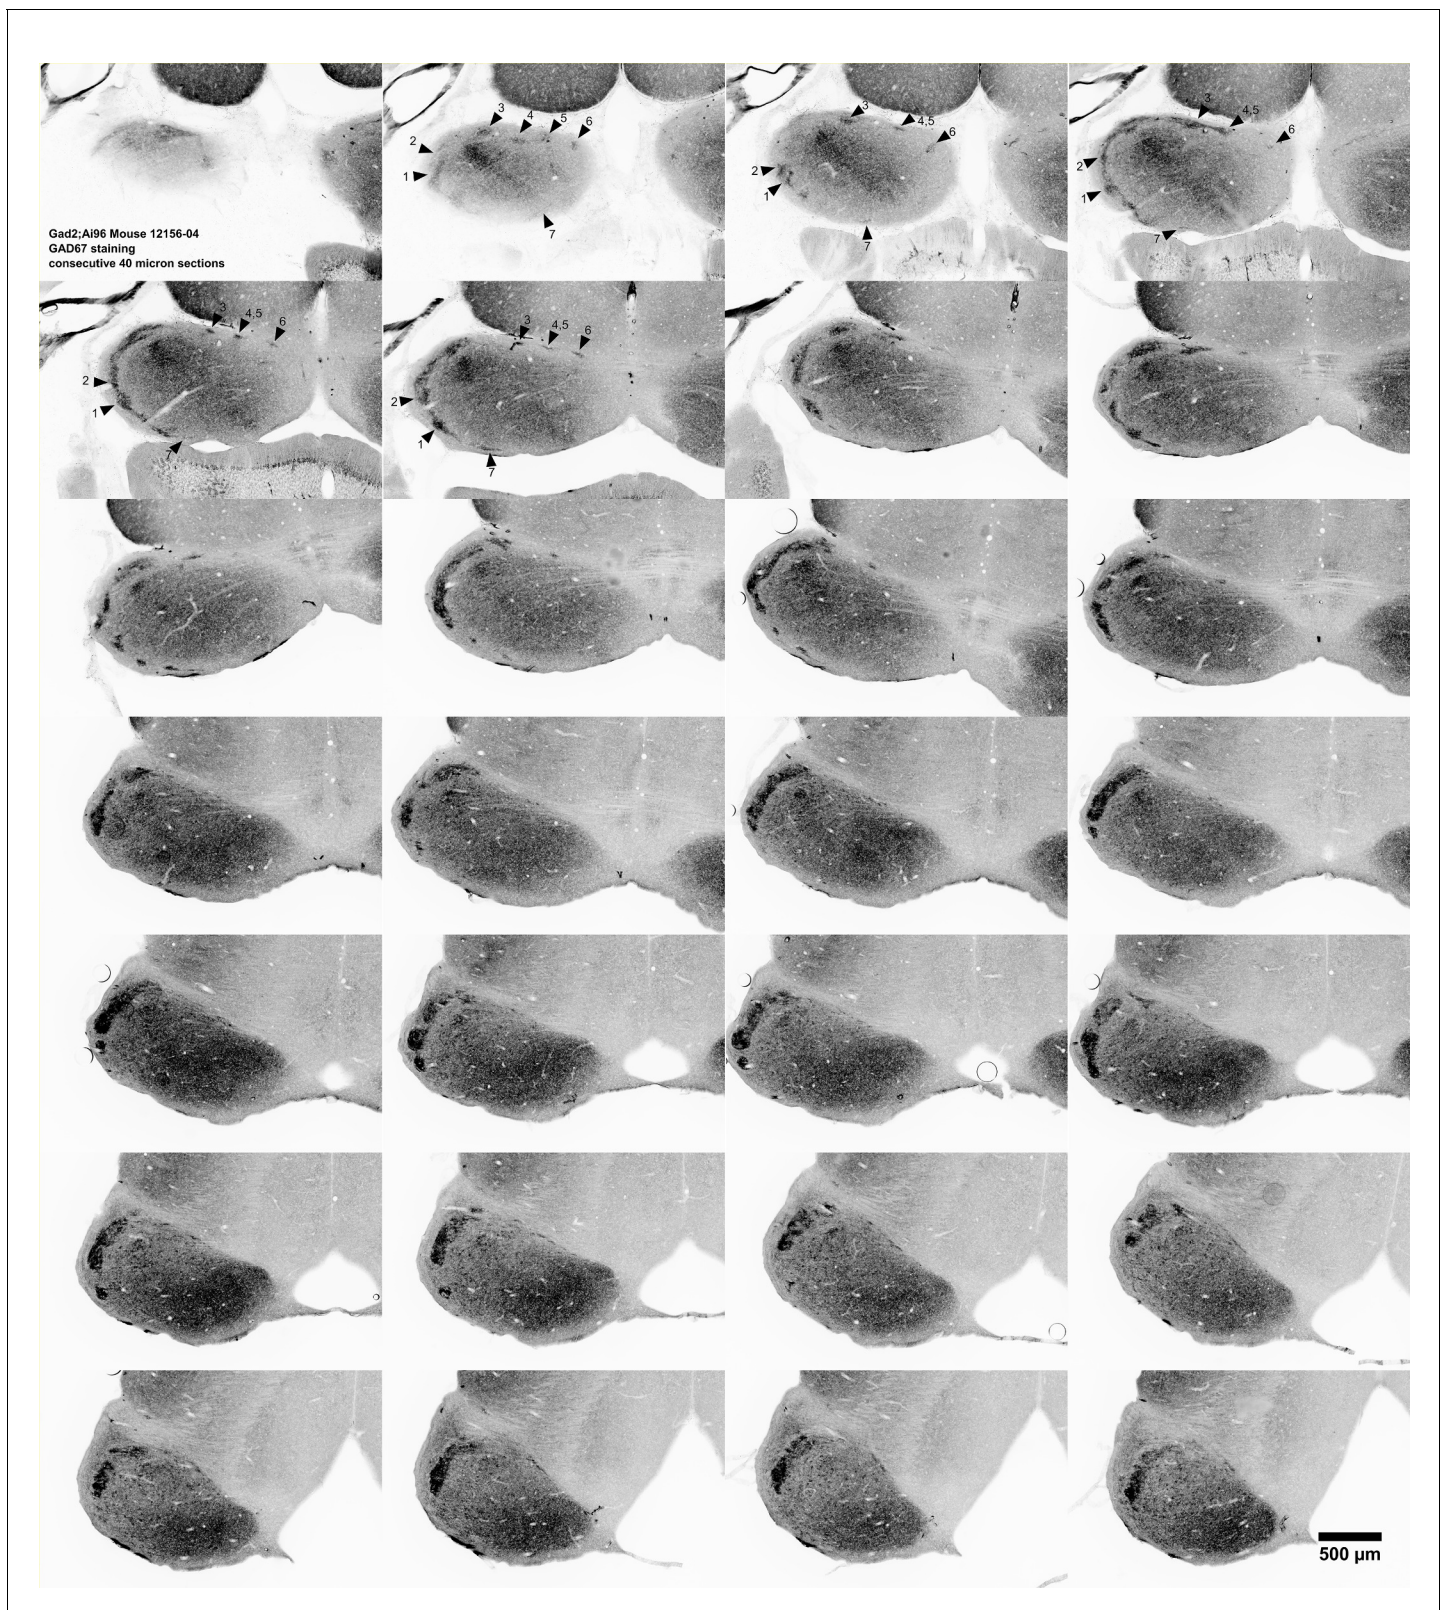

**Figure 9—figure supplement 1.** GAD67 staining in the IC of a series of consecutive 40 µm horizontal brain slices from the same Gad2;Ai96 animal as in **Figure 9A** (animal: 12156–04), displayed from dorsal (top-left) to ventral (right-bottom) showing that the fainter GAD67 staining highlighted in **Figure 9A** is contiguous with the well-stained neurochemical modules in more ventral slices (arrowheads and numbers). Same sections as supplements 2 & 3.

DOI: <https://doi.org/10.7554/eLife.49091.035>



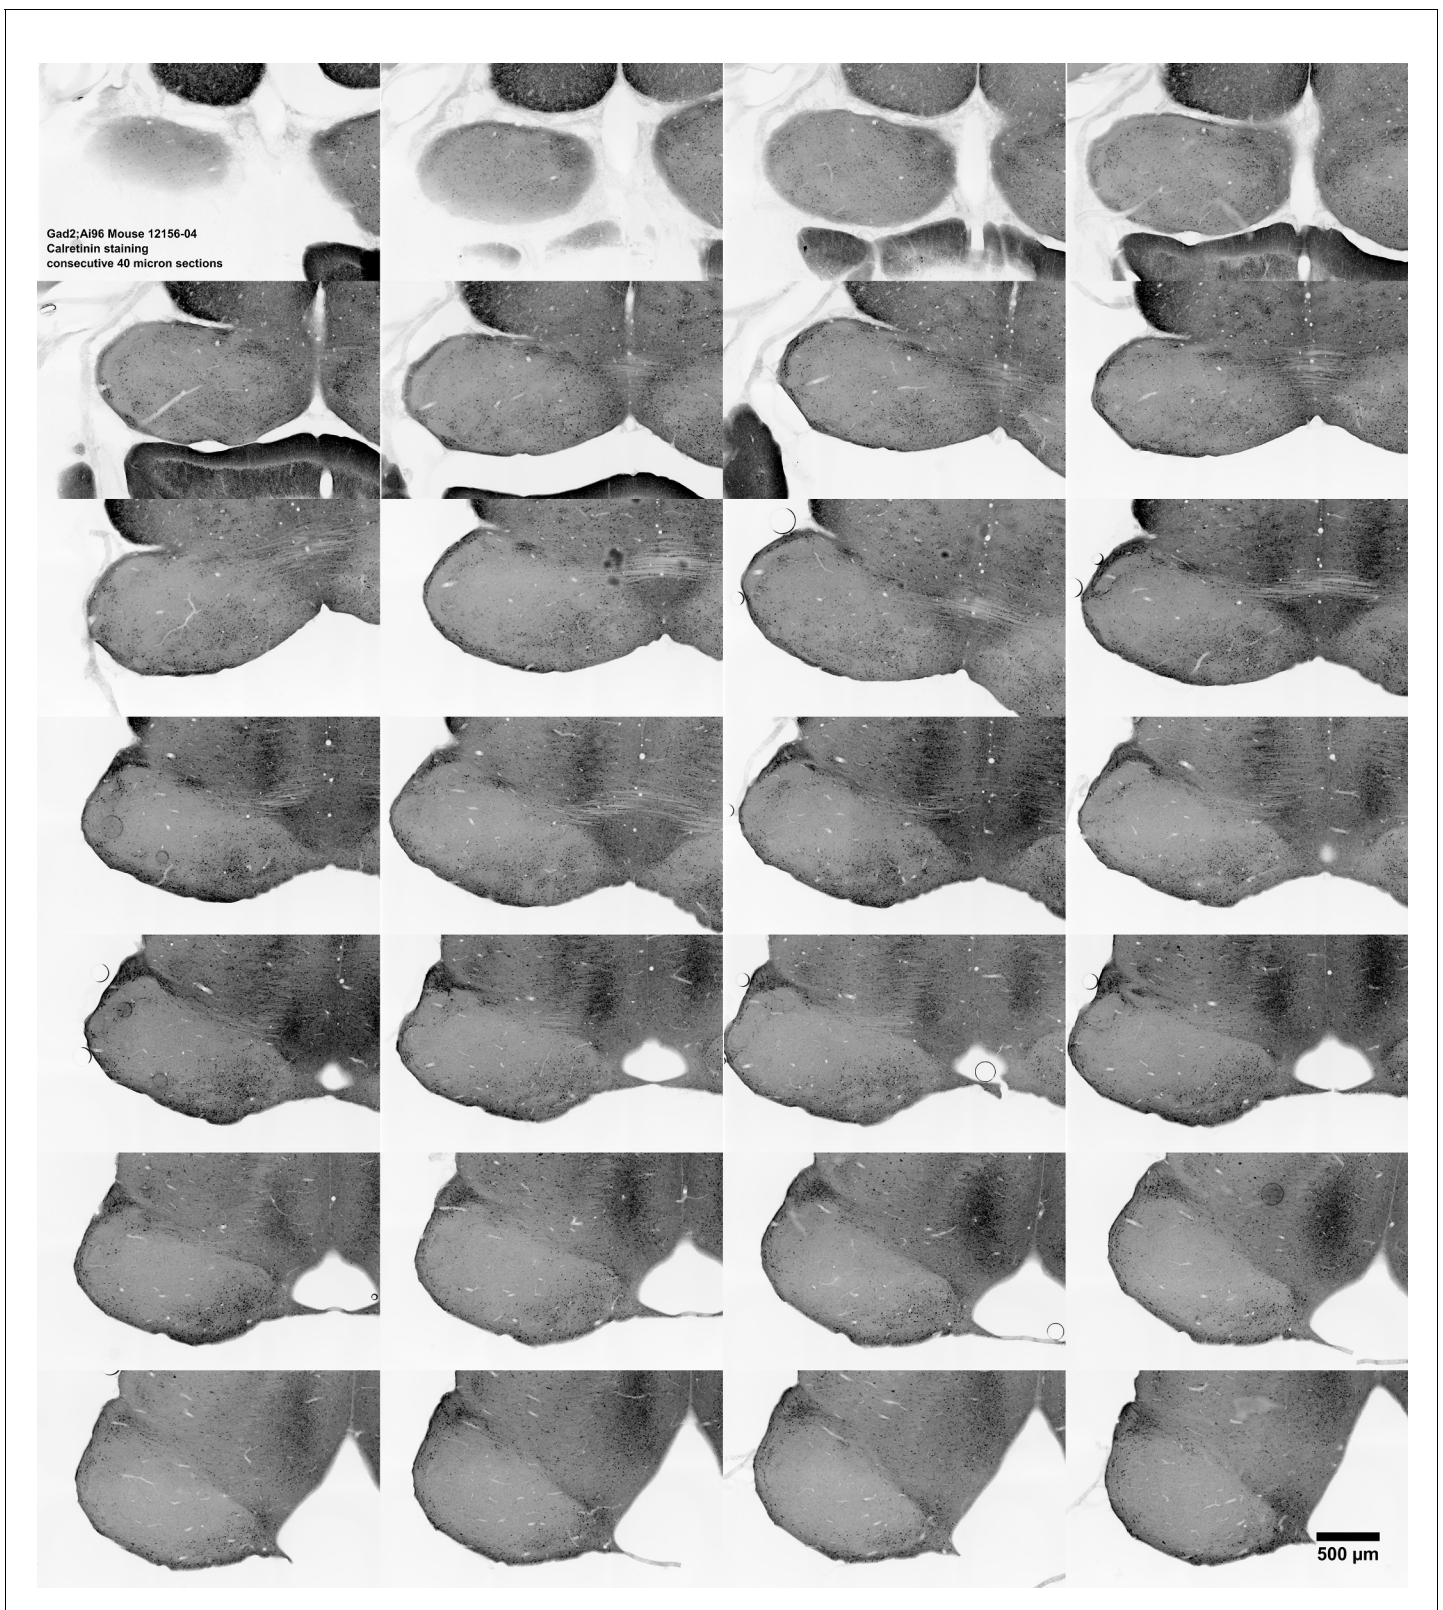

**Figure 9—figure supplement 2.** Calretinin staining in the IC of a series of consecutive 40  $\mu$ m horizontal brain slices from the same Gad2;Ai96 animal as in **Figure 9A** (animal: 12156-04), displayed from dorsal to ventral (left to right, top to bottom). Same sections as supplements 1 and 3.

DOI: <https://doi.org/10.7554/eLife.49091.036>



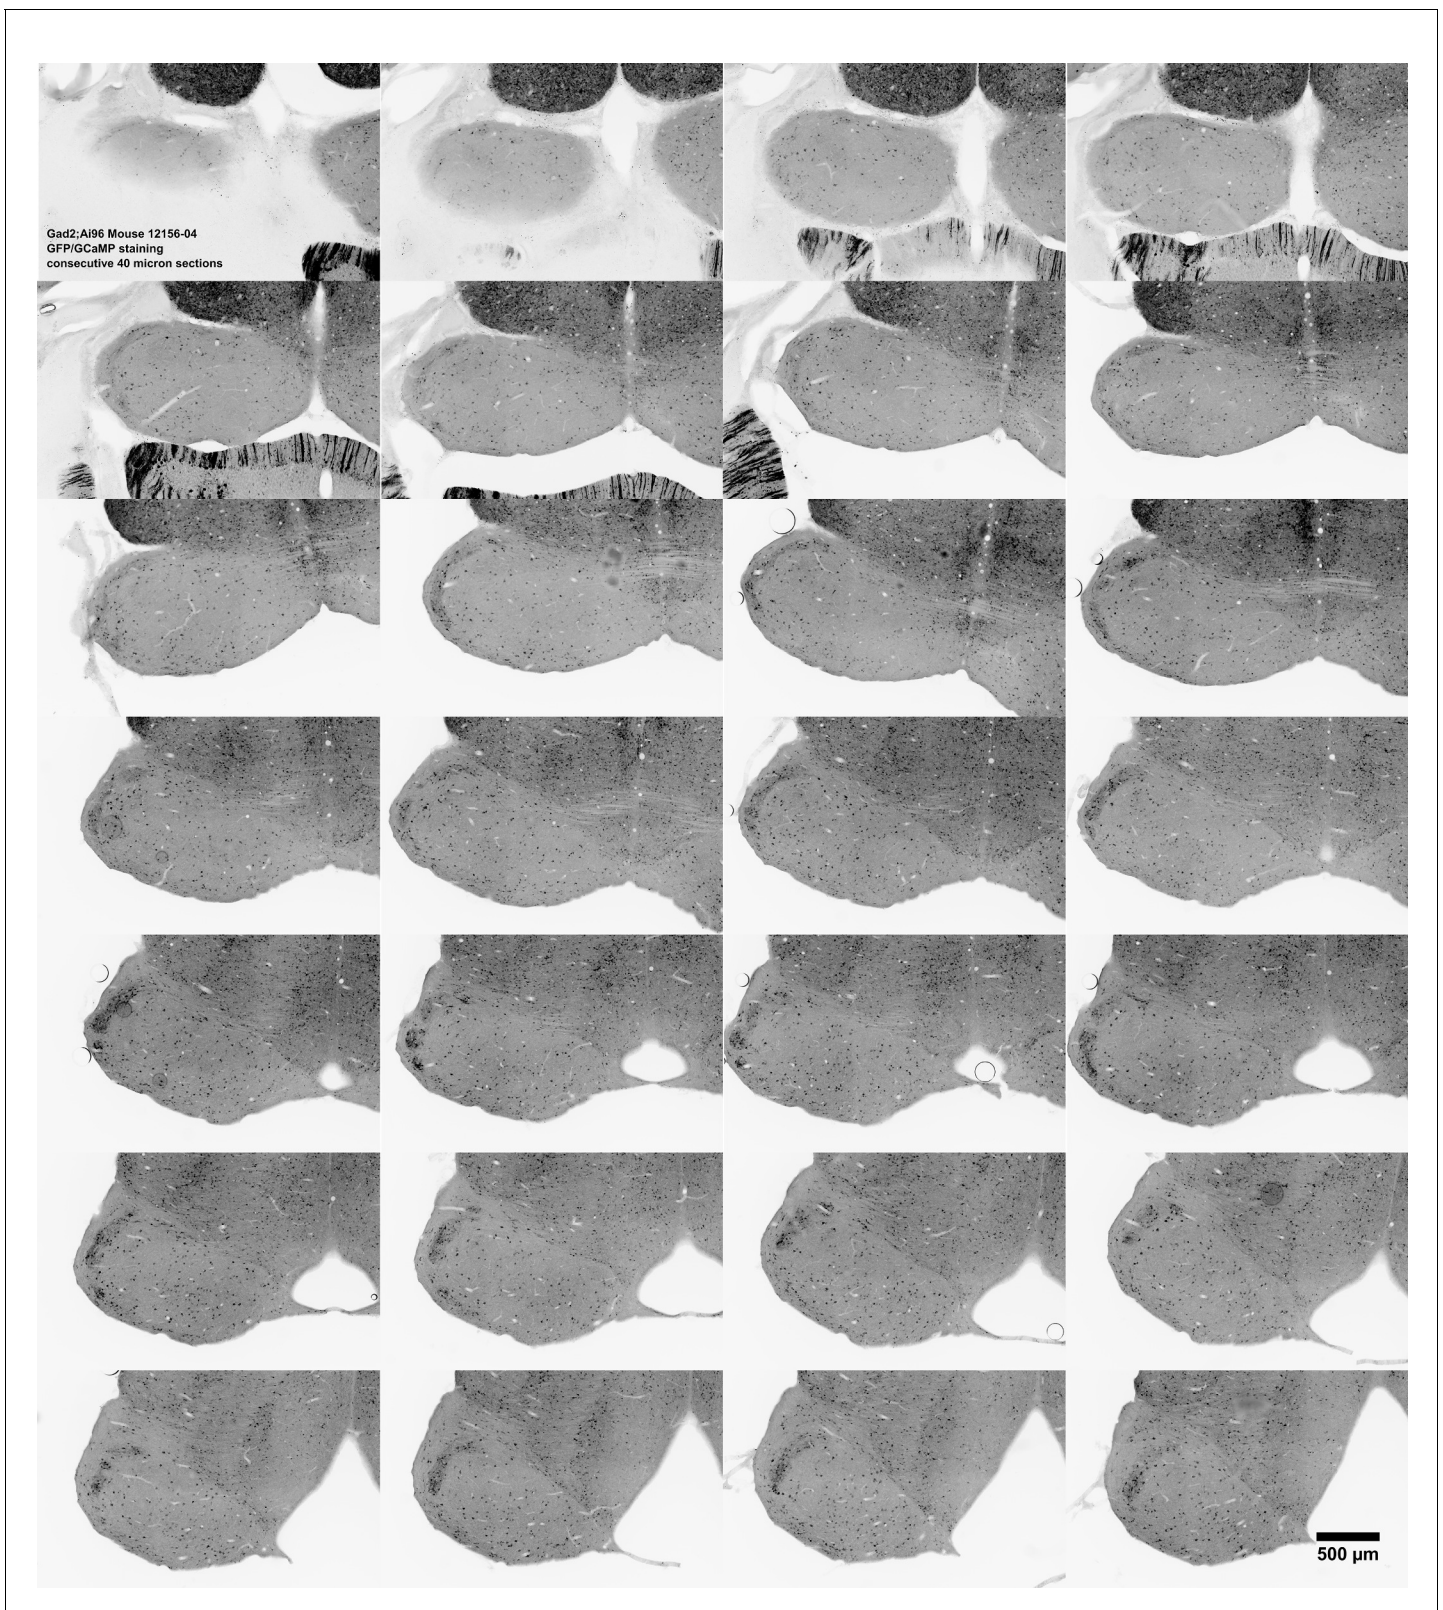

**Figure 9—figure supplement 3.** GFP staining of GCaMP6s in the IC for a series of consecutive 40 µm horizontal brain slices from the same Gad2;Ai96 animal as in **Figure 9A** (animal: 12156–04), displayed from dorsal to ventral (left to right, top to bottom). Same sections as supplements 1 and 2.

DOI: <https://doi.org/10.7554/eLife.49091.037>



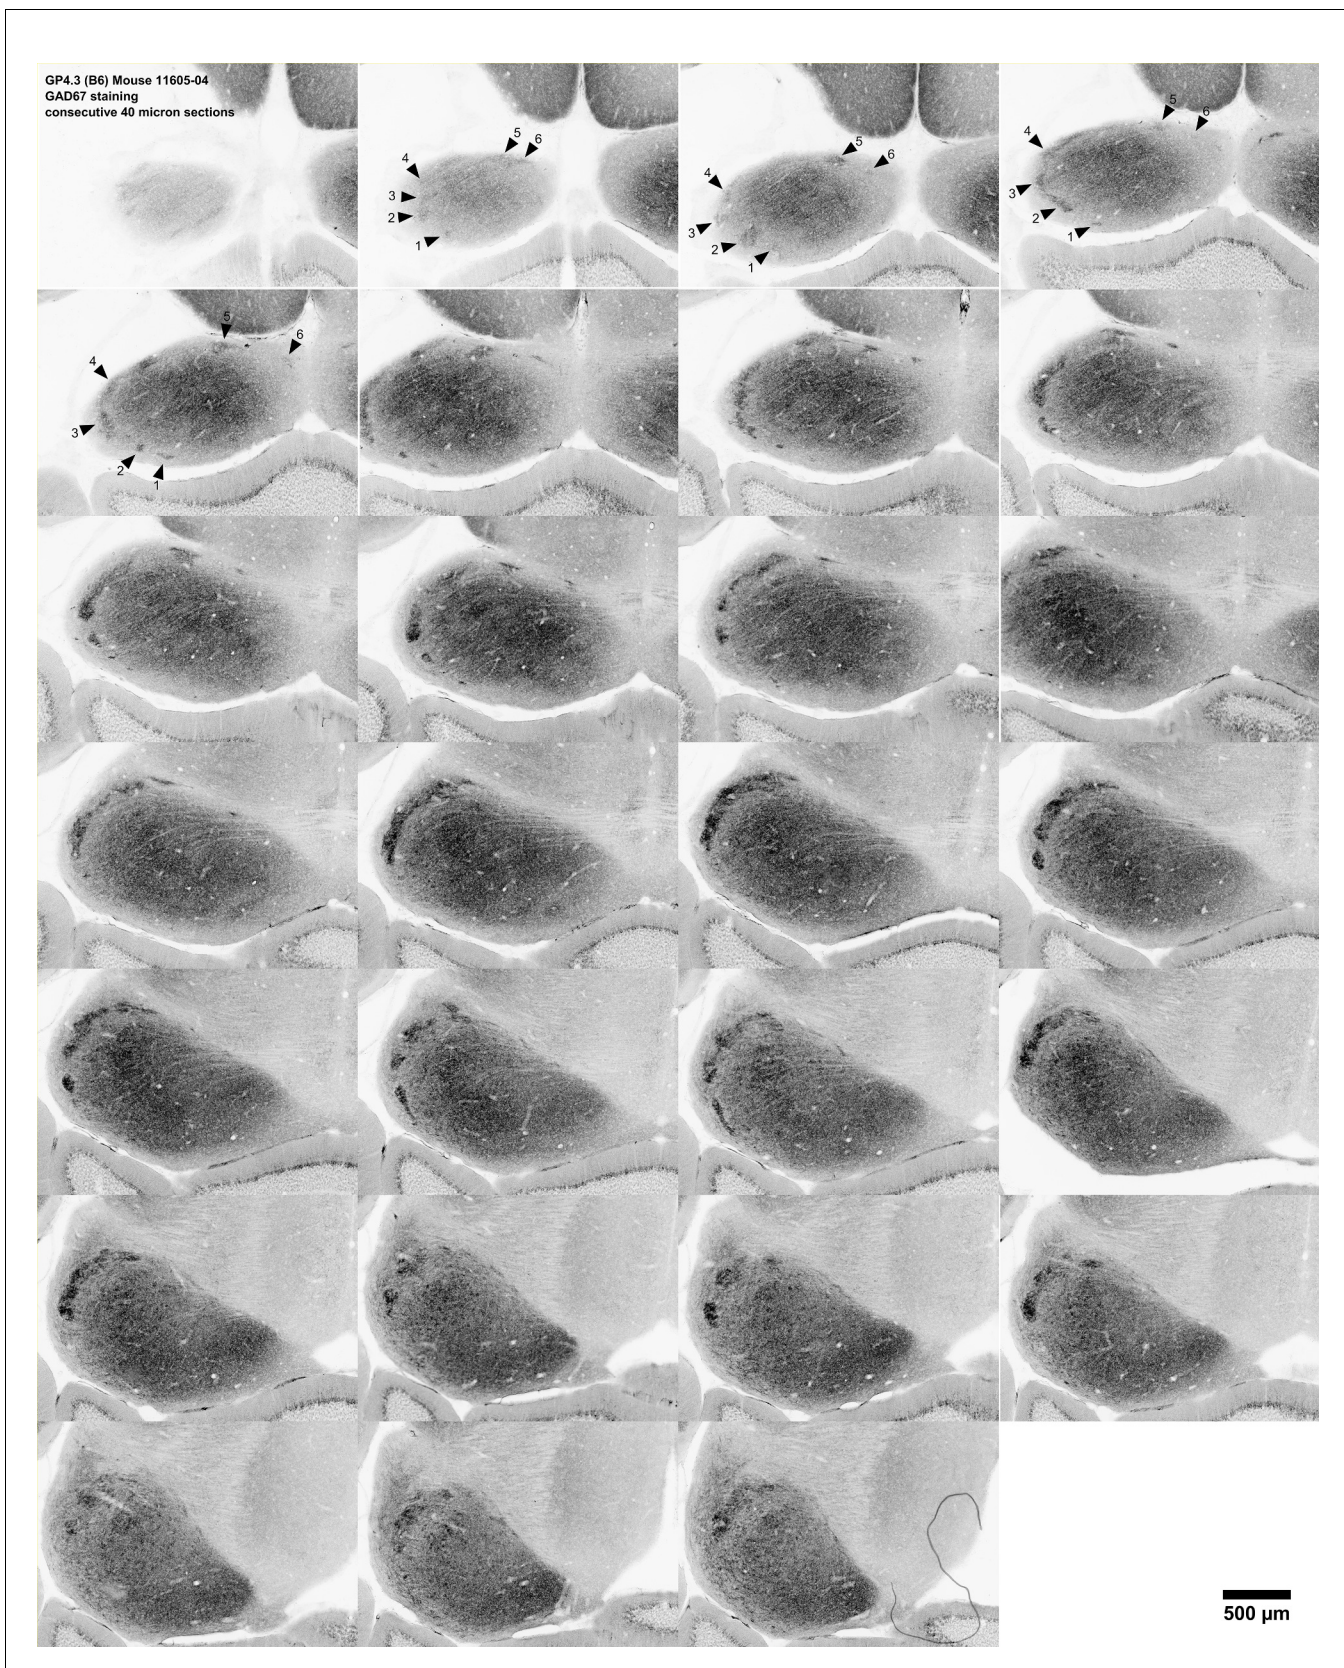

**Figure 9—figure supplement 4.** GAD67 staining in the IC of a series of consecutive 40  $\mu$ m horizontal brain slices from the same GP4.3 animal as in **Figure 9E** (animal: 11605-04; C57BL/6J background), displayed from dorsal (top-left) to ventral (right-bottom), showing that the fainter GAD67 staining

*Figure 9—figure supplement 4 continued on next page*

Figure 9—figure supplement 4 continued

highlighted in **Figure 9E** is contiguous with the well-stained neurochemical modules in more ventral slices (arrowheads and numbers). Same sections as supplements 5 and 6. **Figure 9—figure supplement 5.**

DOI: <https://doi.org/10.7554/eLife.49091.038>



GP4.3 (B6) Mouse 11605-04  
Calretinin staining  
consecutive 40 micron sections

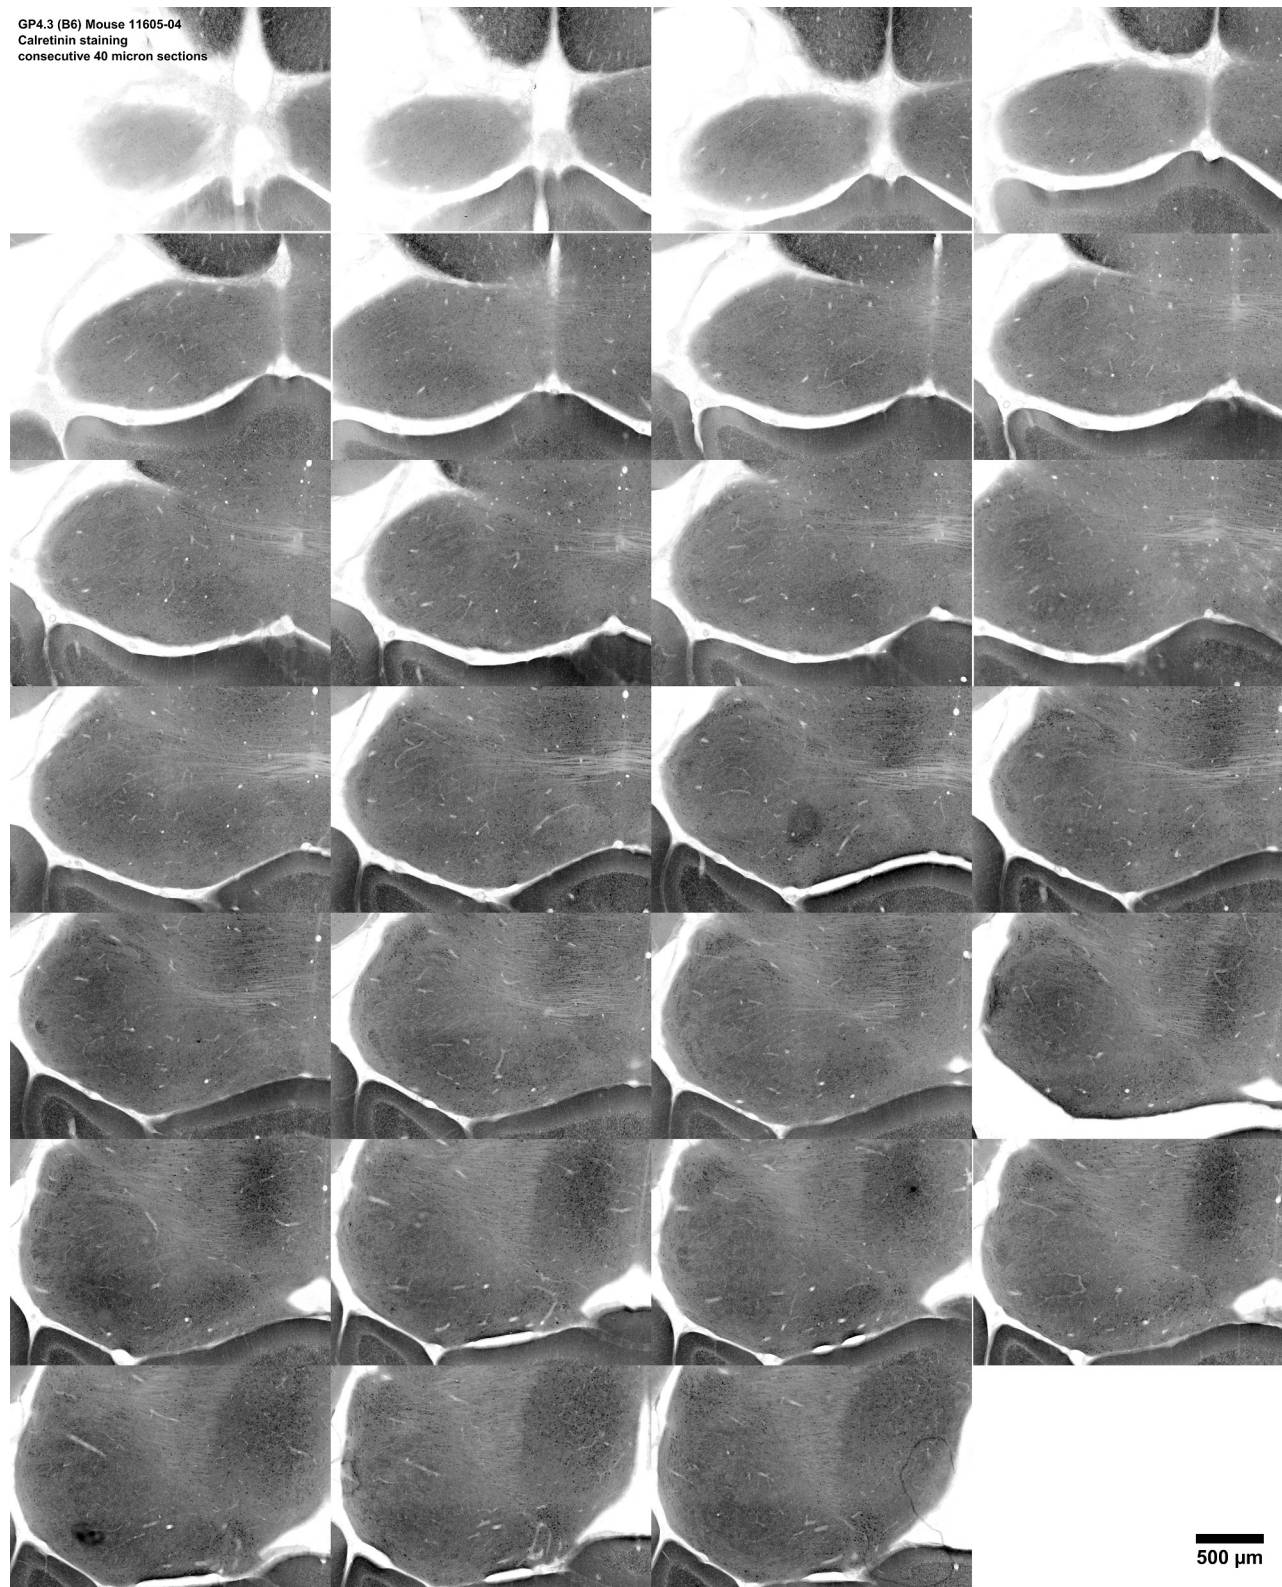

**Figure 9—figure supplement 5.** Calretinin staining in the IC of a series of consecutive 40  $\mu$ m horizontal brain slices from the same GP4.3 animal as in **Figure 9E** (animal: 11605–04; C57BL/6J background), displayed from dorsal to ventral (left to right, top to bottom). Same sections as supplements 4 and 6.

DOI: <https://doi.org/10.7554/eLife.49091.039>



GP4.3 (B6) Mouse 11605-04  
GFP/GCaMP staining  
consecutive 40 micron sections

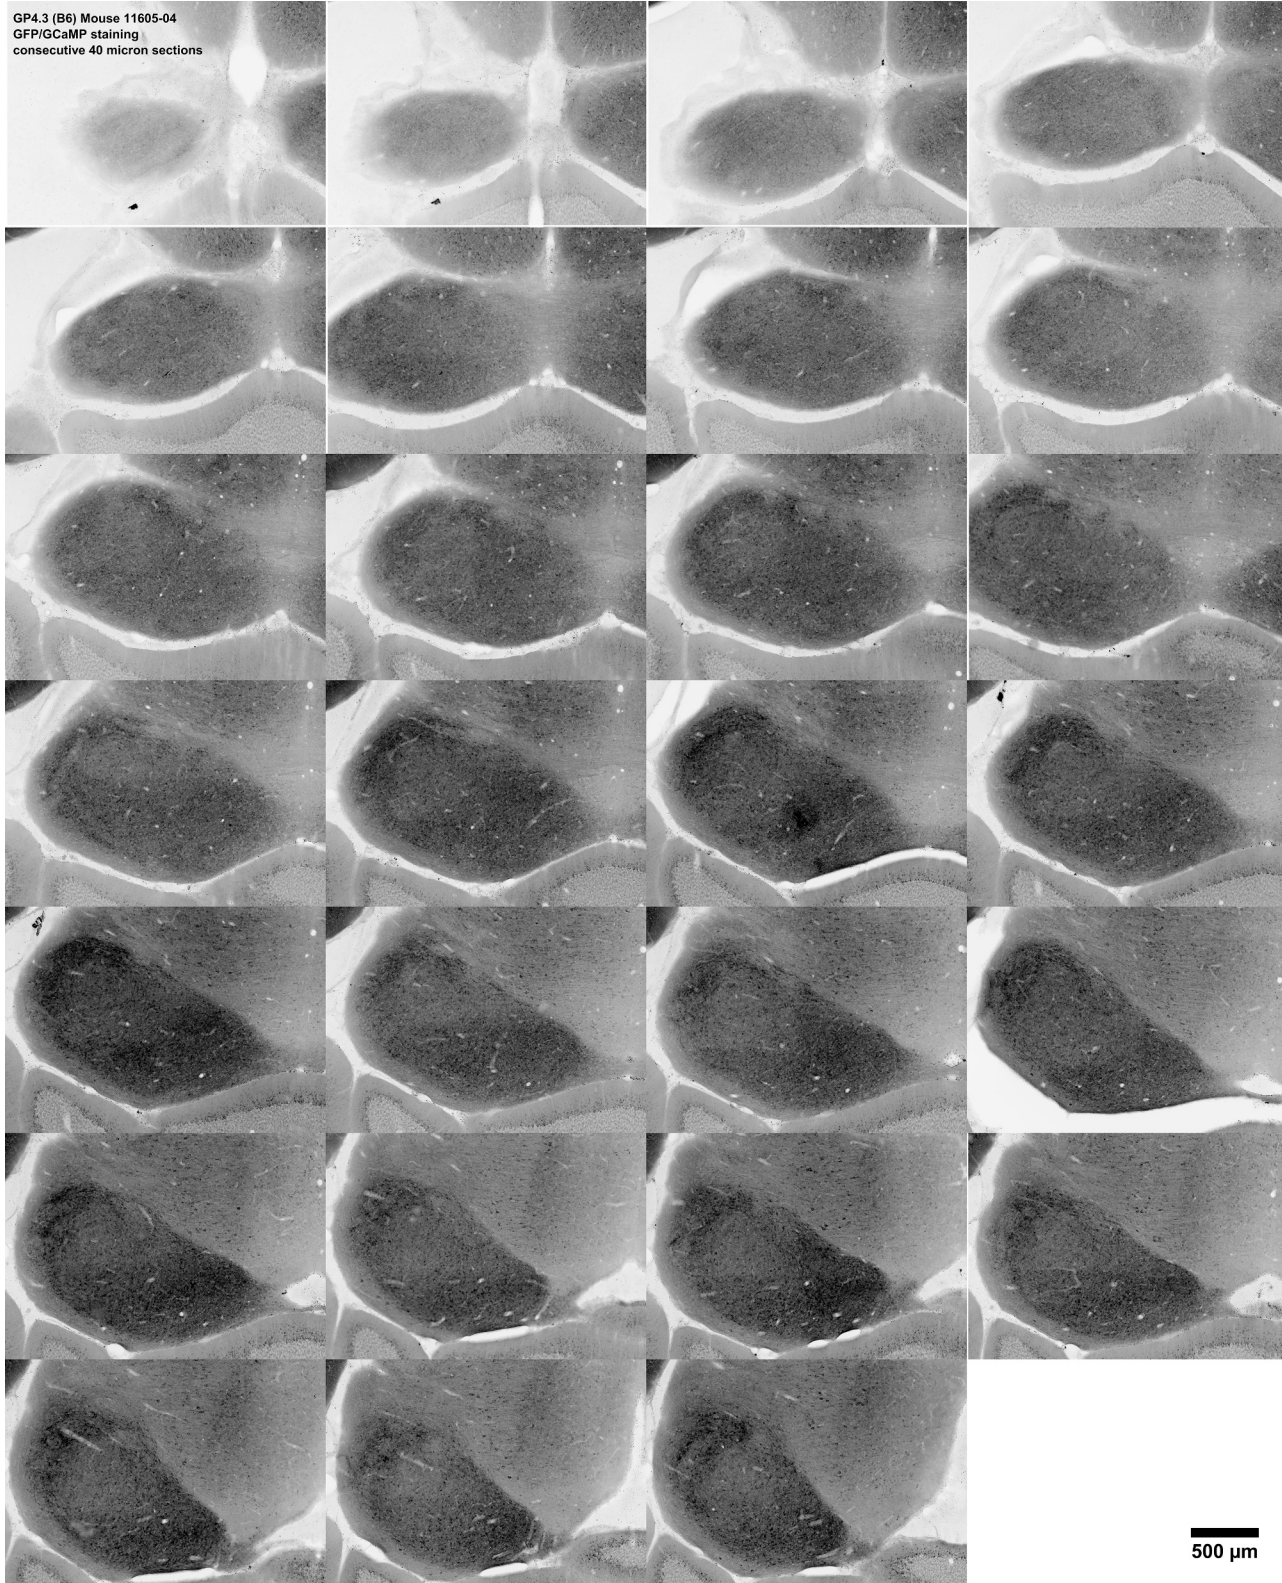

**Figure 9—figure supplement 6.** GFP staining of GCaMP6s in the inferior colliculus for the series of consecutive 40  $\mu$ m horizontal brain slices from the same GP4.3 animal as in **Figure 9E** (animal: 11605–04; C57BL/6J background), displayed from dorsal to ventral (left to right, top to bottom). Same sections as supplements 4 and 5.

DOI: <https://doi.org/10.7554/eLife.49091.040>

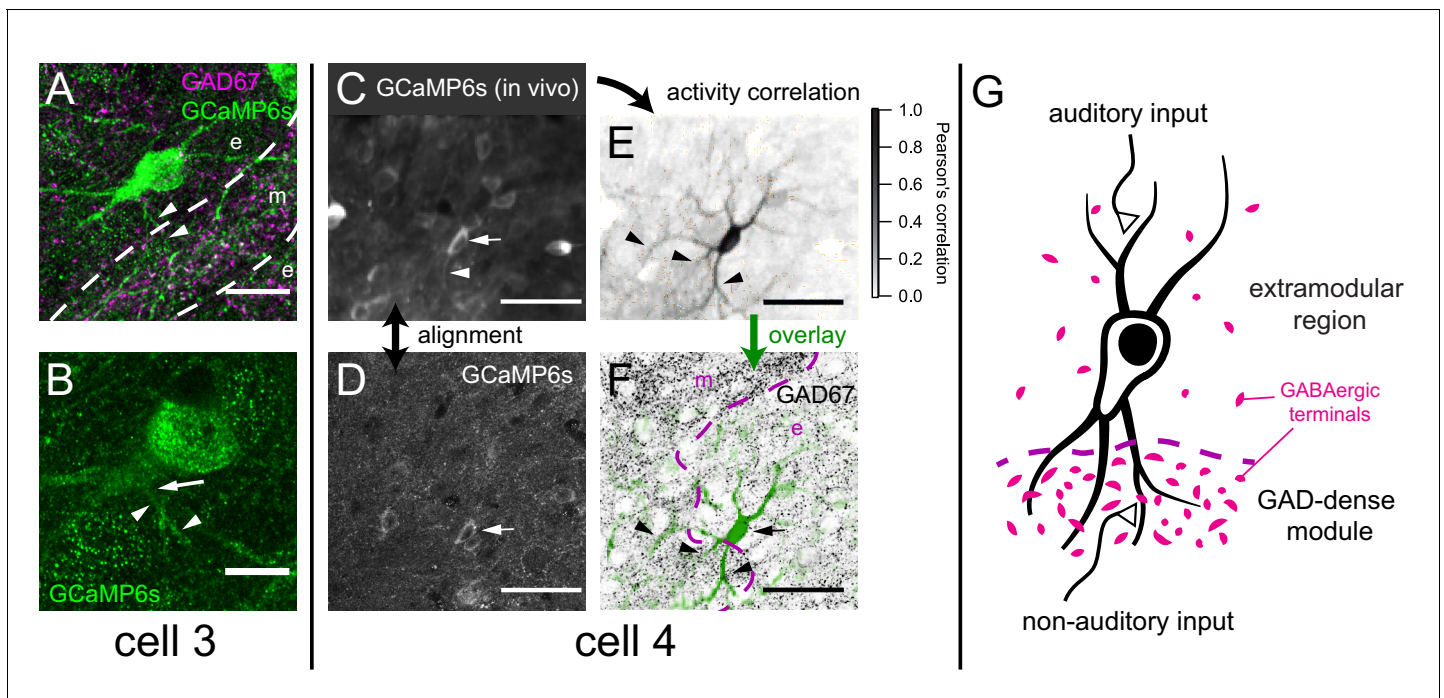

**Figure 10.** Example motion-sensitive cells with dendritic arbor extending into GAD67-dense modules. (A) Maximum projection of GCaMP staining showing dendritic arbor of cell three in **Figure 9D2**, overlaid with a single optical section of GAD67 staining showing a module (m; at same focus as **Figure 9D2**). While its soma is extramodular (e), at least one branch of its dendrite (arrowheads) appeared to extend into the modular region. (B) A single confocal section of cell three showing the root (arrow) of the dendrite labeled in A (small arrowheads). (C) Averaged GCaMP6s fluorescence for the *in vivo* session imaging area in **Figure 9F**, revealing a dendrite of cell four extending into the modular region. (D) Single confocal section of a fixed brain slice stained for GCaMP6s. (E) Dendritic arbor of cell four was revealed using pixel-wise correlation to the average somatic fluorescence (Junek et al., 2009), showing extension into the modular region (arrowheads). (F) Background subtracted pixel correlation from E (green) overlaid onto GAD67 staining (black). (G) Schematic representation of hypothesis that integration of auditory and non-auditory inputs by multisensory neurons in the IC can be based on extension of their dendrites into both modular and extramodular regions. Scale bars: A: 20  $\mu\text{m}$ ; B: 10  $\mu\text{m}$ ; C-F: 50  $\mu\text{m}$ .

DOI: <https://doi.org/10.7554/eLife.49091.042>
